# Supplementary material for: Environmental and Socio–Cultural Factors Impacting the Unique Gene Pool Pattern of Mae Hong-Son Chicken
Source: MDPI journal article supplement (doi:10.3390/ani13121949), 2023-06-10
Supplement: s1 [file s1]

## ***Supplementary Material***

### **1 Supplementary Data**

#### **1.1 Supplementary Data S1**

##### *Social and cultural history*

Mae Hong Son chickens, commonly known as Kai Tai or Kai Jae, are Thai indigenous chickens that are thought to have developed from red junglefowl. These chickens were specifically bred and trained as Kai Tor Kai Tang (decoy) to lure red junglefowl from the wild. Mae Hong Son chickens have played a significant socio-cultural role over the last 200 to 300 years, as evidenced from traditional offerings to spirits (such as weir ghosts, field ghosts or rice paddy ghosts) by the Pgakenyor, Hmong or Tai Yai communities. Mae Hong Son chickens remain closely intertwined with the lives of the local people through Tai proverbs as well as well-known local dishes, Yum Jin Kai (spicy chicken salad) and Oop Kai Tai (chicken curry). According to the *Alphabet Legend* of the Pgakenyor community in Mae Hong Son over the last 300 years, the chicken consumed more alphabets than any other animal (alphabet legends are those which recount the origin, or cause of lack therein, of alphabets in particular groups of people), and therefore, Mae Hong Son chicken bones were historically used by the Pgakenyor community for divination. A wooden stick with a pointed end was inserted into the hole in a chicken leg bone and the direction of the stick was then interpreted. This belief and its corresponding ritual are recorded in an ancient Lanna literary work, *Chao Suwat Nang Buakham*. The *Handbook on the Characteristics of Chicken* also details the good and bad characteristics of Kai Tor Kai Tang (native chicken breed name) as believed by the Tai Yai community in Mae Hong Son. Mae Hong Son chickens have been inextricably linked with the lives of Mae Hong Son residents for more than 300 years, as evidenced by Tai proverbs and well-known local dishes.

#### **1.2 Materials and Methods**

##### *Species distribution modeling*

We selected the logistic output with suitability data ranging from 0 to 1, representing the occurrence probability of target species, with default settings for convergence threshold and maximum number of iterations (500) [1]. Regularization data were selected automatically by MaxEnt software to

reduce model over-fitting [2]. Selection of the optimal MaxEnt model was made using the 10th percentile presence probability and the 10-fold cross-validation method to generate a binary map. Response curves of the predictor variables were developed and Jackknife importance was tested in the final optimal model [3]. To decrease predictive uncertainty, we used the ensemble forecasting approach following Araújo and New [4] and applied the basic mathematical function of mean ensembles to calculate the final logistic outputs [5]. Model validation and predictive performance were used to evaluate the area under the curve (AUC) of receiver operating characteristics [6]. AUC data were threshold-independent measures of model accuracy that illustrated the model's discrimination ability [6], where an AUC value of 0 indicated a model with no better discrimination than chance, an AUC value of 1 indicated perfect discrimination, and an AUC value greater than 0.8 indicated excellent discrimination. The averaged prediction maps depict species presence probability with continuous values ranging from 0–1. This presence probability was classified into five equal-sized categorical classes following Li et al. [7]: SC-5 = very high suitability ( $p > 0.8$ ), SC-4 = high ( $0.6 > p \leq 0.8$ ), SC-3 = moderate ( $0.4 > p \leq 0.6$ ), SC-2 = least suitability ( $0.2 \geq p \leq 0.4$ ) and SC-1 = no suitability ( $p < 0.2$ ). Finally, the area under each of the classified categories was calculated using map algebra in ArcGIS.

#### *Mitochondrial D-loop sequence analysis*

Multiple sequence alignments were performed for 50 sequences in the mt D-loop dataset. The sequences were aligned using the default parameters of the Molecular Evolutionary Genetics Analysis 11 (MEGA11) software [8]. All unalignable and any sites containing gaps were carefully removed and trimmed from the datasets. Ambiguous sites behind the primer sequences were trimmed from the fragments. Estimates of the haplotype ( $h$ ) and nucleotide ( $\pi$ ) diversity, number of haplotypes ( $H$ ), the estimator theta ( $S$ ), overall haplotype and average number of nucleotide differences ( $k$ ) were calculated using the mt D-loop sequences using DnaSP version 6.12.03 [9]. A statistical parsimony network of the consensus sequences was constructed using the Templeton, Crandall and Sing (TCS) algorithm in PopART version 1.7 to examine the haplotype grouping and population dynamics [10]. The genetic differentiation coefficient ( $G_{ST}$ ), Wright's  $F$ -statistic for subpopulations within the total population ( $F_{ST}$ ), and the  $\Phi_{ST}$  values from the sequence data and haplotype data were estimated using Arlequin version 3.5.2.2 [11]. The  $F_{ST}$  and  $\Phi_{ST}$  values were calculated by analyzing 1,000 permutations of haplotypes between the populations [12]. The  $F_{ST}$  statistic relies on the differences in haplotype frequencies, whereas  $\Phi_{ST}$  considers the relationship between the haplotypes based on molecular genetic

distance [13]. The average number of nucleotide substitutions for each site between populations ( $D_{xy}$ ) and the net nucleotide substitutions of each site between populations ( $D_a$ ) were analyzed using DnaSP version 6.12.03. A statistical parsimony network of the consensus sequences was constructed using the Templeton, Crandall and Sing (TCS) algorithm in PopART version 1.7 to examine haplotype grouping and population dynamics [10]. The demographic history of the mt D-loop sequence dataset was then determined using the statistical test of neutrality. Tajima's  $D$  [14], Fu and Li's  $D^*$  and  $F^*$  tests [15], Fu's  $F_s$  [16], the Ewens-Watterson test and Chakraborty's test were performed using Arlequin version 3.5.2.2 [13]. Ramos-Onsins and Rozas's  $R_2$ , which has greater statistical power for small sample sizes, was calculated using DnaSP version 6.12.03 [17]. The significance of the differences among these statistical test values was determined using 10,000 coalescent simulations in accordance with the recommended software parameters. The mismatch distribution approach was used to test for genetic signatures of historical population expansion within Mae Hong Son chickens populations. In this approach, an observed frequency distribution of pairwise nucleotide differences among individuals with expected distributions from an expanding population (small raggedness index) or a stationary population (large raggedness index) was obtained [18,19]. These models were applied to estimate the parameters of population expansion with a generalized least-squares approach and to compute their confidence intervals by bootstrapping (10,000 replicates) using DnaSP version 6.12.03. Bayesian coalescent-based methods were then performed to evaluate historical demographic fluctuations using the Extended Bayesian Skyline Plot (EBSP) in BEAUTi version 2.0.2 (part of the BEAST version 2.0.2 package) [20,21] by applying the Hasegawa–Kishino–Yano model, strict clock model and coalescent Bayesian skyline model with a gamma distribution prior. For the mean substitution rate, the prior was set as a log-normal distribution with a mean of 3.6%/million years and a standard deviation of 0.6%/million years to match the rate estimated from fossil data [22]. The EBSP fitted different demographic scenarios by allowing changes in population size over time. The software package Tracer was applied to assess burn-in and the effective sample sizes (ESS) of the parameters.

*Analysis of genetic diversity and population structure among three populations of Mae Hong Son chicken using microsatellite DNA markers*

The microsatellite DNA analysis followed the same procedure outlined in our previous animal research projects [23,24]. The allelic frequency, number of alleles ( $N_a$ ), number of effective alleles ( $N_{ea}$ ), observed heterozygosity ( $H_o$ ), expected heterozygosity ( $H_e$ ), linkage equilibrium and Wright's  $F$ -statistic for subpopulations within the total population ( $F_{ST}$ ) were calculated using Arlequin version

3.5.2.2 [11]. Due to limited population sizes, deviations from the Hardy-Weinberg equilibrium were evaluated at each locus by the Markov chain Monte Carlo (MCMC) approximation of Fisher's exact test using the "genepop" function in the package "stats" of R version 4.1.2 [25–27]. Welch's t-test (unequal variance between samples) identified any significant differences between  $H_o$  and  $H_e$  using the "t.test" function in "stats" of R version 4.1.2 [27,28]. To test for equal variances between the  $H_o$  and  $H_e$ , Bartlett's homogeneity of variance test was performed using the "bartlett.test" function in "stats" of R version 4.1.2 [27]. Allelic richness ( $AR$ ) was calculated by FSTAT version 2.9.4 [29]. MicroChecker version 2.2.3 identified the null allelic markers [30]. The polymorphic information content ( $PIC$ ) was estimated using the Excel Microsatellite Toolkit [31] and calculated for each locus. Shannon's information index ( $I$ ) and the fixation index ( $F$ ) were calculated for each locus of the population using GenAlEx version 6.5 [32].

To consider the possibility of sibling-sibling or parent-offspring pairs in the captive population, we determined whether the Mae Hong Son chickens were more related than random unrelated individuals. Relatedness values ( $r$ ) were calculated for all female-female, male-male, and male-female pairs. Mean pairwise  $r$  values based on population allelic frequencies in captivity were calculated using GenAlEx version 6.5 [32]. Individual and overall  $F_{IS}$  with 95% confidence intervals were calculated using the LynchRt estimator [33], as implemented in the program COANCESTRY [34]. Examinations of  $r$  values and  $F_{IS}$  were conducted assuming that the averages did not differ significantly from random assortments of unrelated individuals. Distributions of pairwise  $r$  values and  $F_{IS}$  between all pairs from the sampled captivities were compared by a bootstrap version of the Kolmogorov-Smirnov test to provide relationships [35], using the "ks.test" function in the package stats of R version 4.1.2 [27]. Pairwise genetic distances among populations were calculated based on the infinite allele model (IAM) using  $F_{ST}$  with corrected p-values in Arlequin version 3.5.2.2. and the stepwise mutation model (SMM) using  $R_{ST}$  in FSTAT version 2.9.3 [29]. Considering the possible influences of null alleles on genetic differentiation estimates, the data were subjected to ENA (excluding null alleles) correction using the Free<sup>NA</sup> program [36] to obtain pairwise  $F_{ST}^{ENA}$  values. To elucidate the group structure, an analysis of molecular variance (AMOVA) was performed using Arlequin 3.5.2.2. Unlike  $F_{ST}$ , this algorithm identifies subgroup hierarchical structure and does not require a priori assumption of the Hardy-Weinberg equilibrium. Nei's genetic distances between groups were then examined using GenAlEx version 6.5 [37]. The heterozygosity excess and shift in allelic frequency distributions in genetically bottlenecked populations were tested using Bottleneck version 1.2.02 [38]. The Wilcoxon signed-rank test was performed using a two-phased mutation model (TPM) and SMM to obtain probabilities for

excess heterozygosity due to the small sample sizes of loci. The TPM was performed with 95% single-step and 5% multi-step mutations, with variance among multiple steps set at 12. However, the Wilcoxon signed-rank test only detects relatively short-term bottleneck events. To test for relatively long-term bottleneck events, the  $M$  ratio test [39] was performed using Arlequin version 3.5.2.2. The  $M$  ratio is the mean number of alleles in a population divided by the allelic size range and indicates reductions in both recent and historical population sizes.

Principal coordinate analysis (PCoA) was performed using GenAlEx version 6.5 [32] to assess the overall relationship among individuals in the population. Analysis of principal components (DAPC) was performed using the package ADEGENET 2.0 [40] in R 4.1.2 [27]. DAPC makes no assumptions about population models [40]. It defines synthetic variables where genetic variation is maximized between clusters of individuals ( $K$ ) and minimized within clusters. The model-based clustering method implemented in STRUCTURE version 2.3.4 was used to determine population structure [41]. The run length was set to 100,000 MCMC replicates after a burn-in period of 100,000 generations using correlated allelic frequencies under a straight admixture model. The number of clusters ( $K$ ) varied from 1 to 25, with 25 replicates for each value of  $K$ . The most probable number of bunches was dictated by plotting the log-likelihood of the information ( $\ln \Pr (X|K)$ ) [41] over the scope of tested  $K$  esteems before choosing the  $K$  esteem value at which  $\ln \Pr (X|K)$  settled. The  $\Delta K$  strategy was also applied using Structure Harvester [42].

## 2 Supplementary Figures and Tables

### 2.1 Supplementary Figures

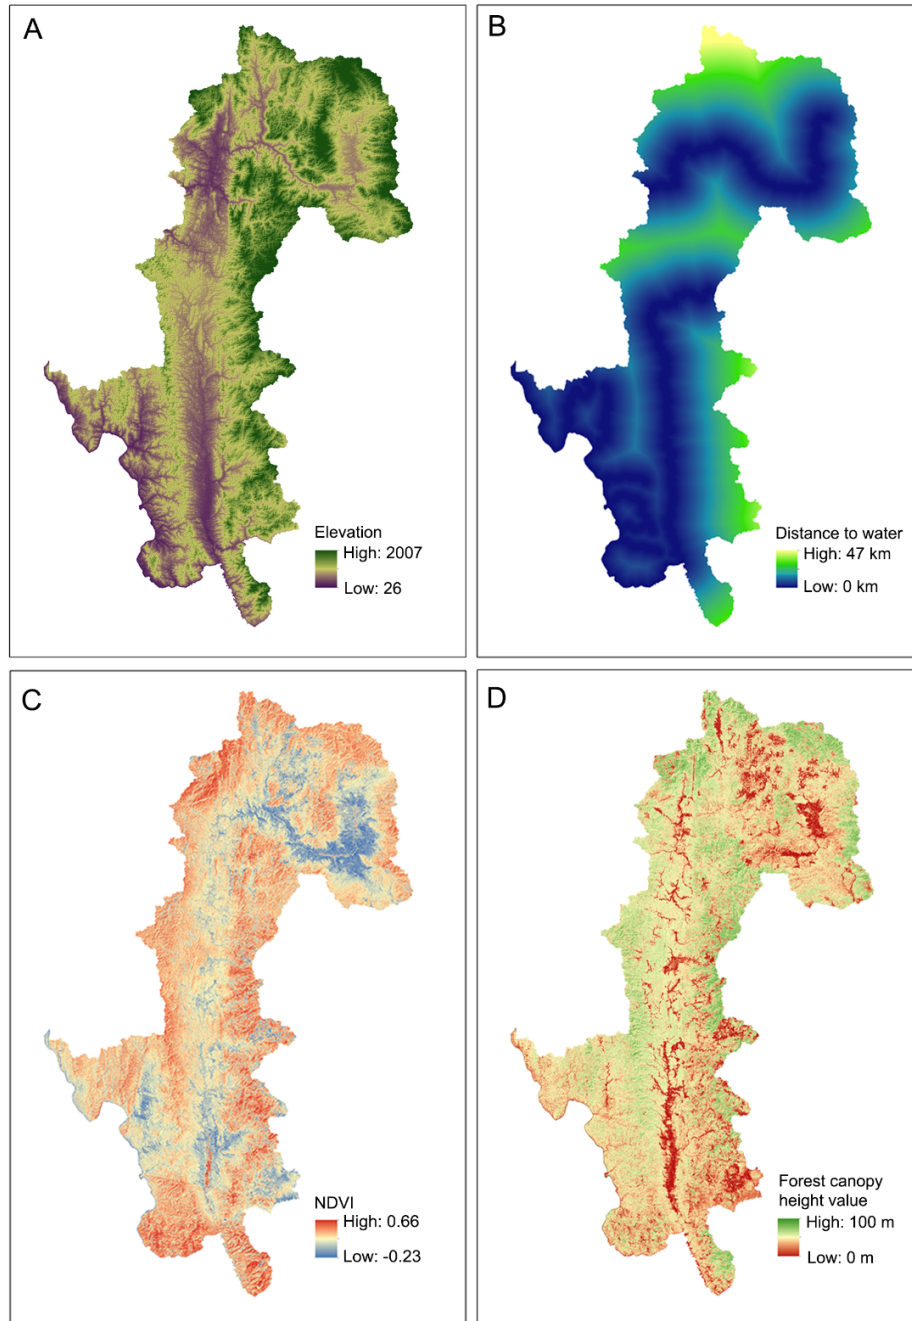

**Figure S1** Environmental variables used to assess the species distribution model of Mae Hong Son chicken: (A) Elevation, (B) Distance to water, (C) Normalized difference vegetation index (NDVI) and (D) Forest canopy height.

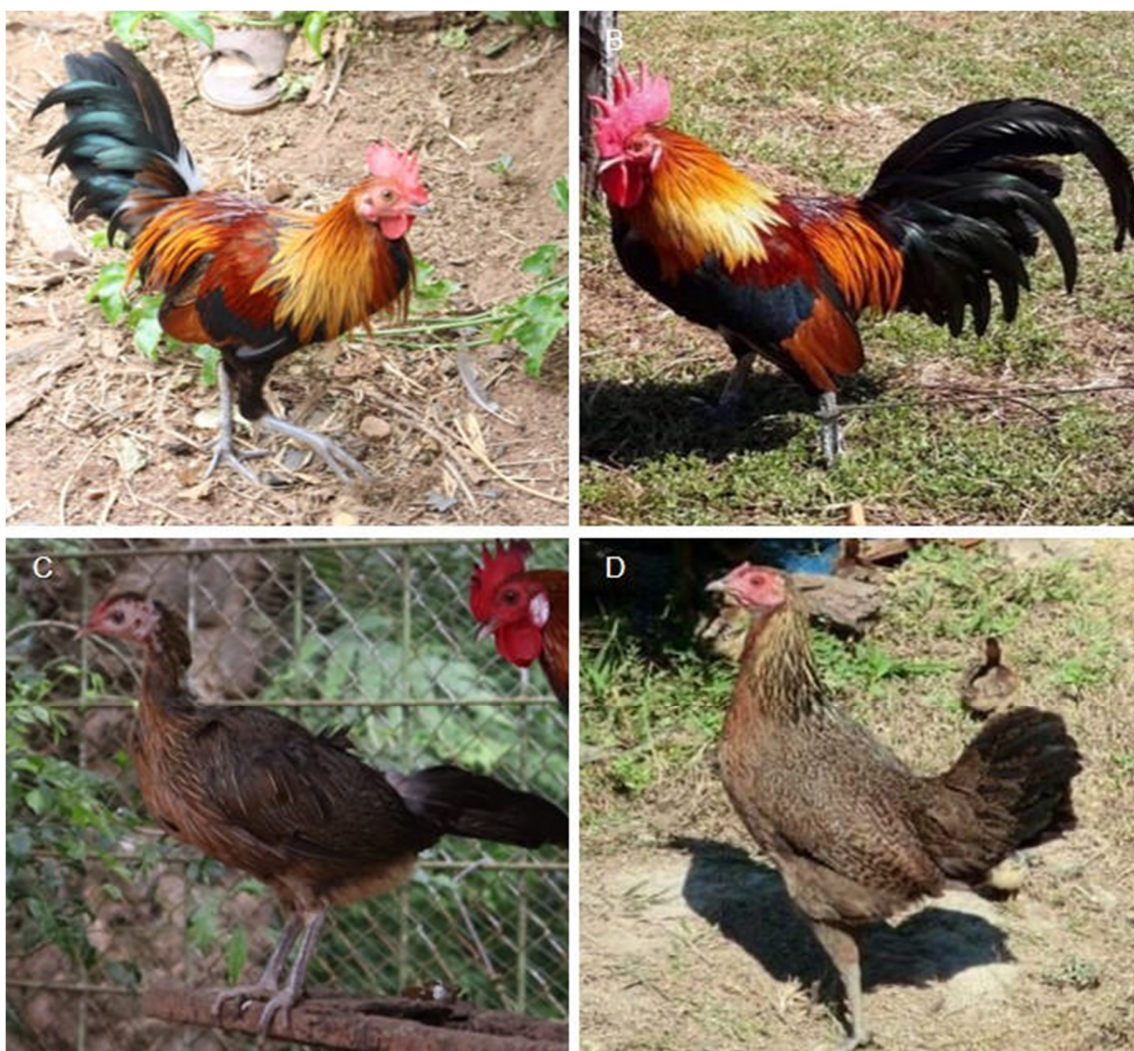

**Figure S2** Phenotypic characteristics of male (A–B) and female (C–D) of Mae Hong Son chicken.



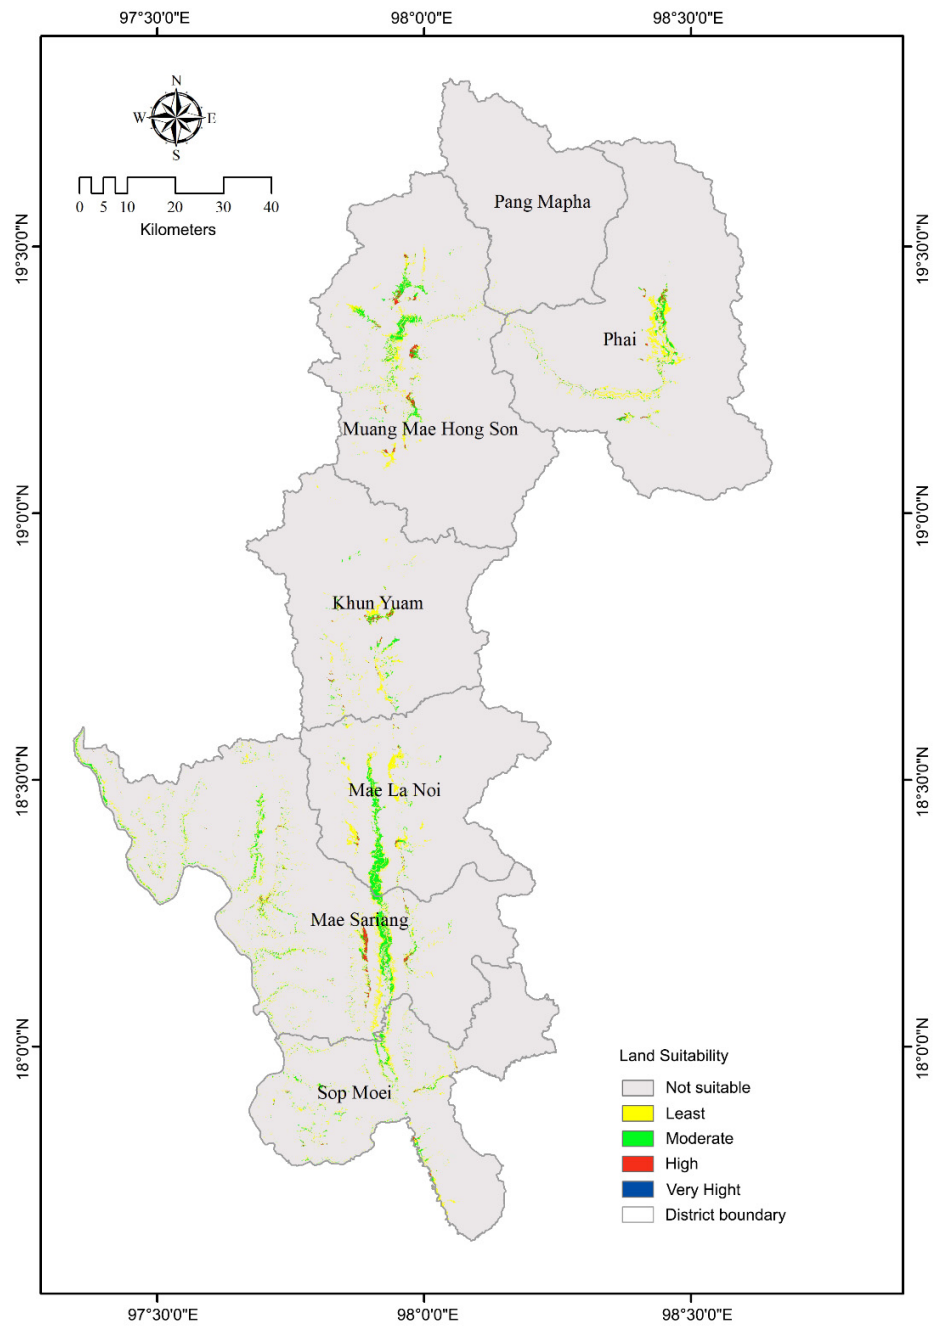

**Figure S3.** Potential land suitability modeling of Mae Hong Son chickens in Thailand.



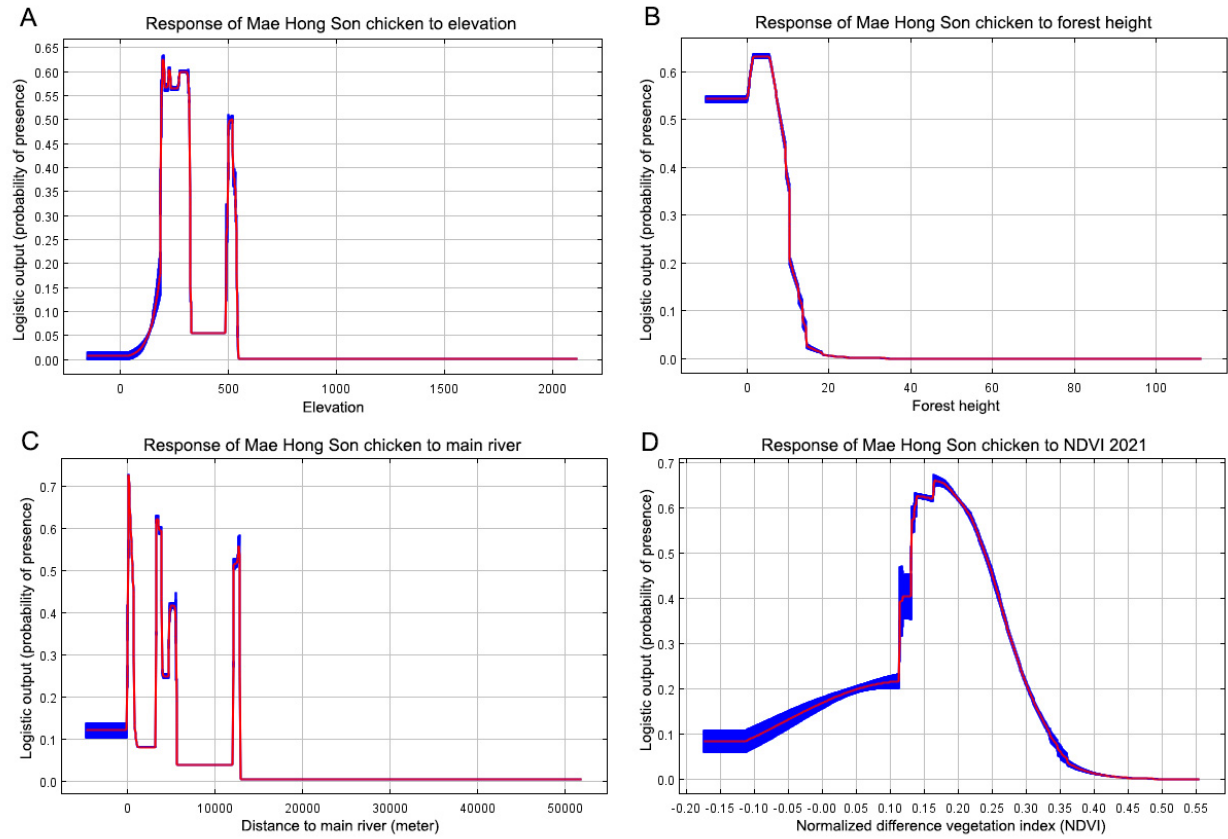

**Figure S4.** MaxEnt model response area curves of the predictor variables influencing wild chicken distribution. (A) Elevation, (B) Forest canopy height, (C) Distance to main river and (D) Normalized difference vegetation index (NDVI).

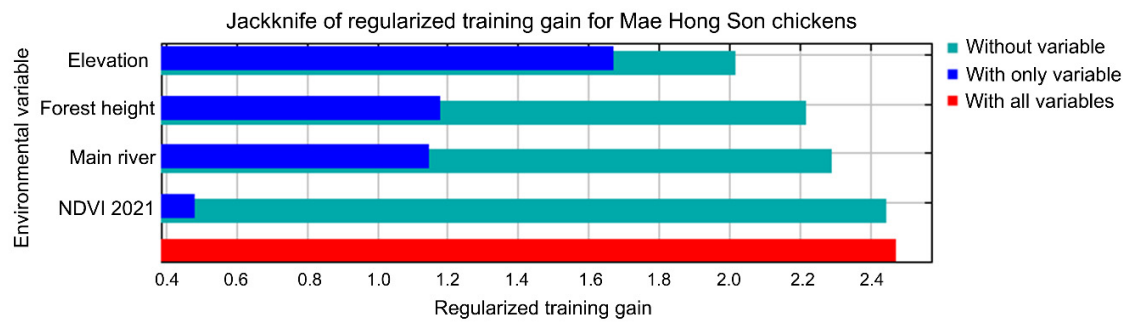

**Figure S5.** The Jackknife method used in the maximum entropy modeling and environmental factors affecting the potential distribution of Mae Hong Son chickens.

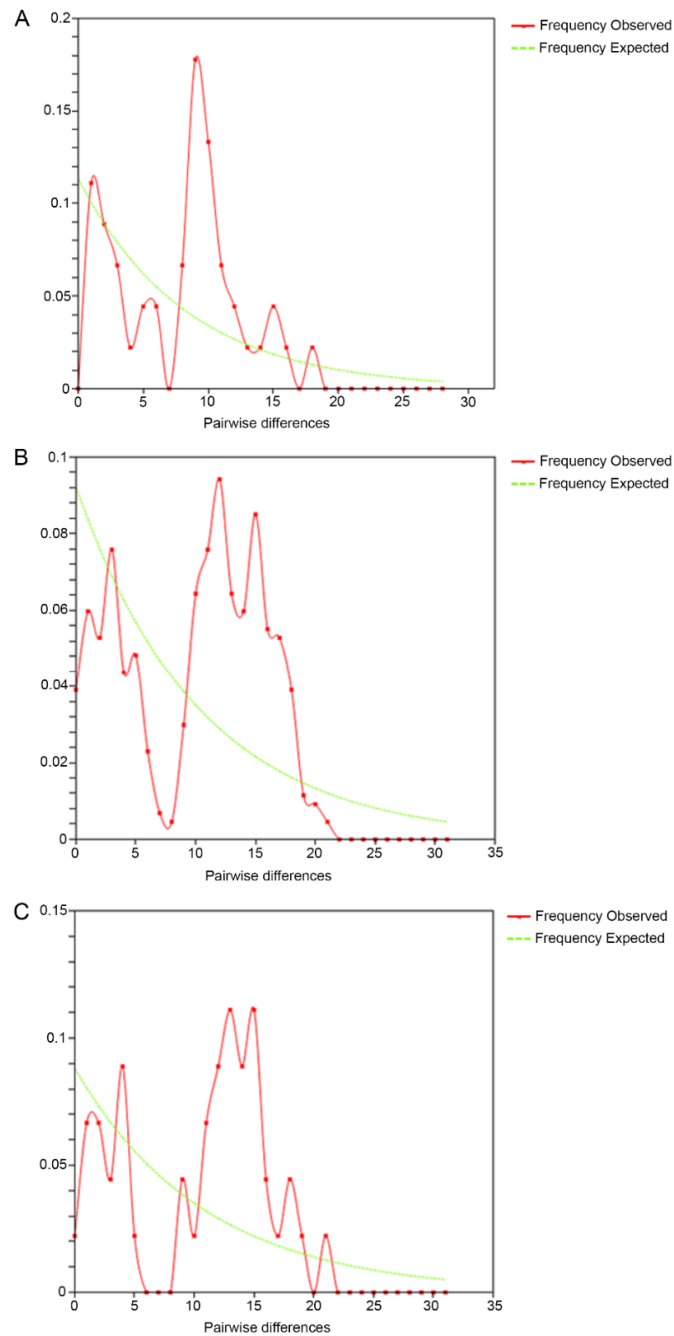

**Figure S6.** Mismatch Distributions Analysis of Mae Hong Son chickens derived from (A) the Mae Hong Son farmer community, Mae Hong Son, Thailand (MHSF), (B) Mae Hong Son Livestock Research and Breeding Center, Mae Hong Son, Thailand (MLRBC), or (C) Chiang Mai Livestock Research and Breeding Center, Chiang Mai, Thailand (CLRBC). The x- and y-axes represent the number of pairwise differences (mismatches) and the frequency of these differences, respectively. The observed mismatch distribution (red line) is compared to the expected distribution (green line) for a stable population.

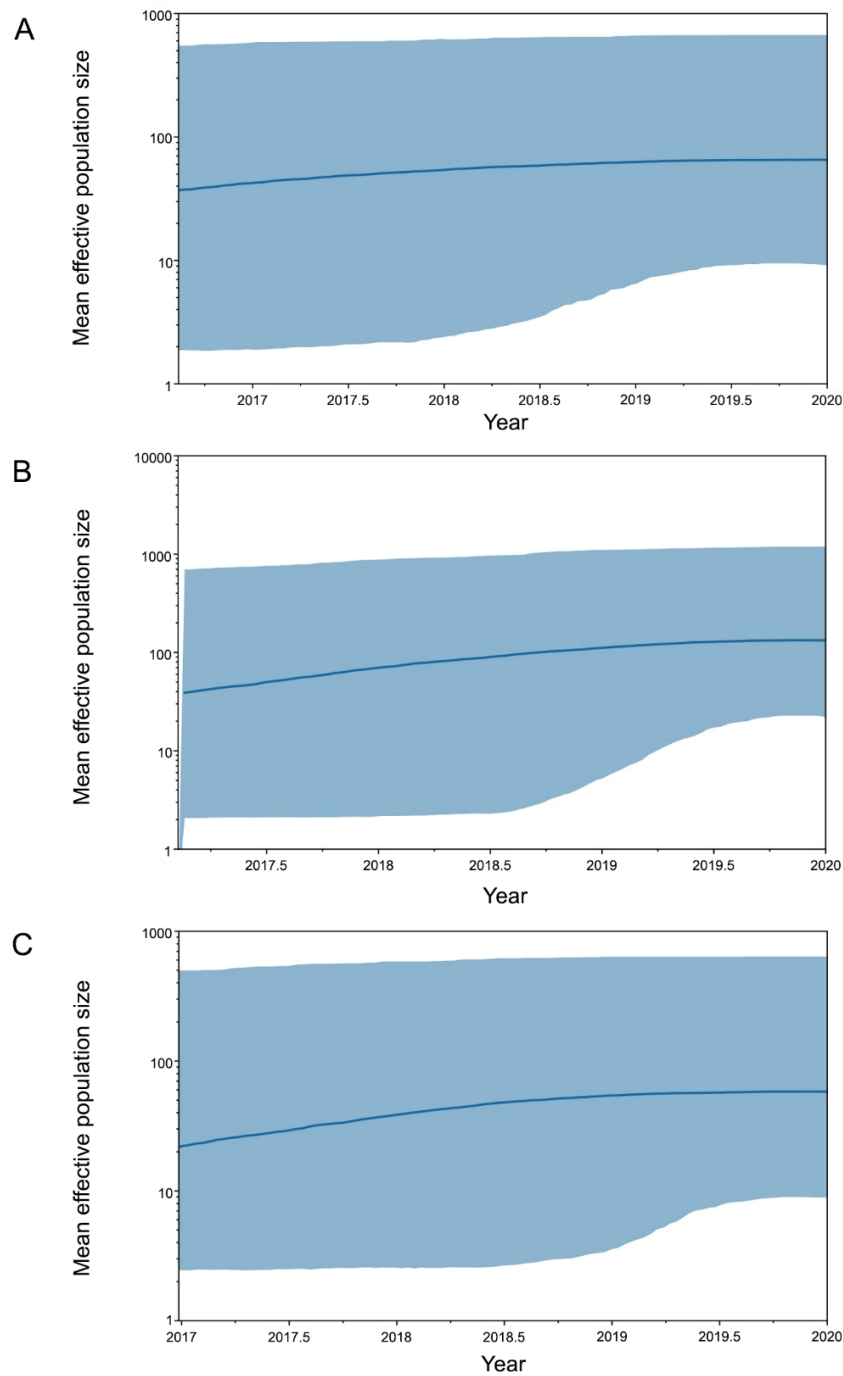

**Figure S7.** Output of the Coalescent Bayesian Skyline analysis. The black line represents the median estimated effective population size. Blue areas represent the upper and lower bounds. The x-and y-axes represent the time in years and a log scale, respectively. Mae Hong Son chickens derived from (A) the Mae Hong Son farmer community, Mae Hong Son, Thailand (MHSF), (B) Mae Hong Son Livestock Research and Breeding Center, Mae Hong Son, Thailand (MLRBC), and (C) Chiang Mai Livestock Research and Breeding Center, Chiang Mai, Thailand (CLRBC).

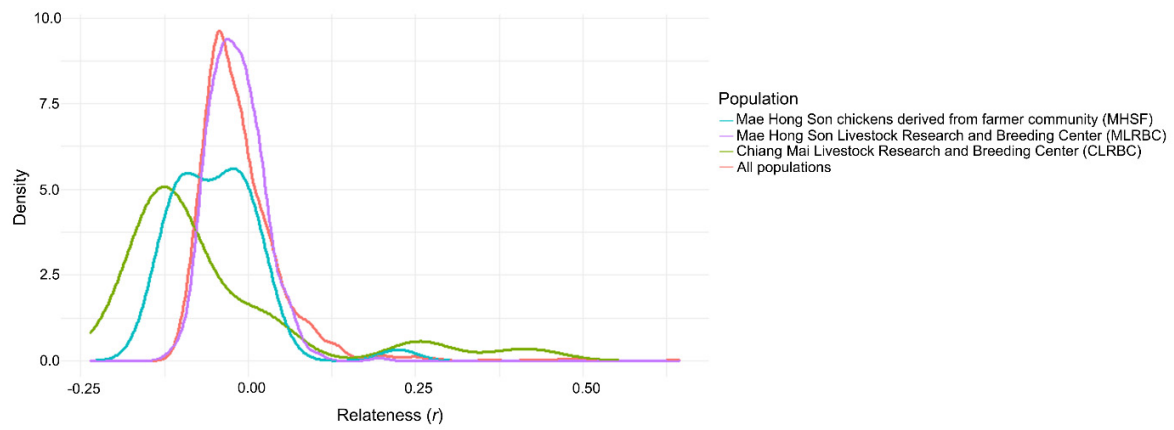

**Figure S8.** Observed distribution of relatedness ( $r$ ) in Mae Hong Son chickens ( $n = 50$ ) (*Gallus gallus*, Linnaeus, 1758) [43], plotted against expected distributions.

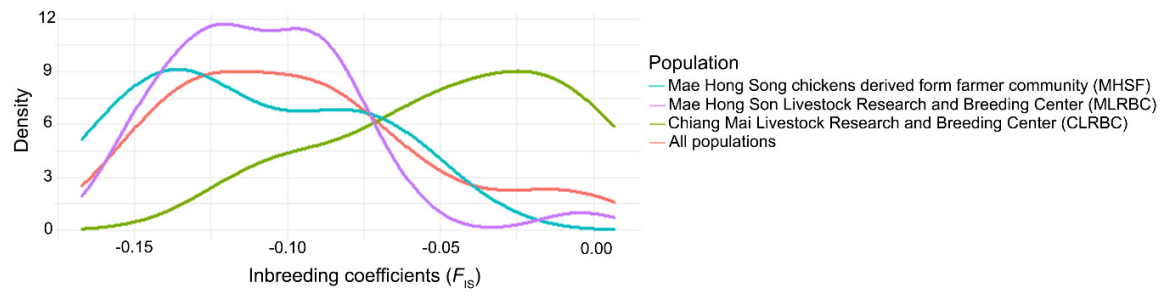

**Figure S9.** Observed distribution of inbreeding coefficients ( $F_{IS}$ ) in Mae Hong Son chickens ( $n = 50$ ) (*Gallus gallus*, Linnaeus, 1758) [43], plotted against expected distributions.

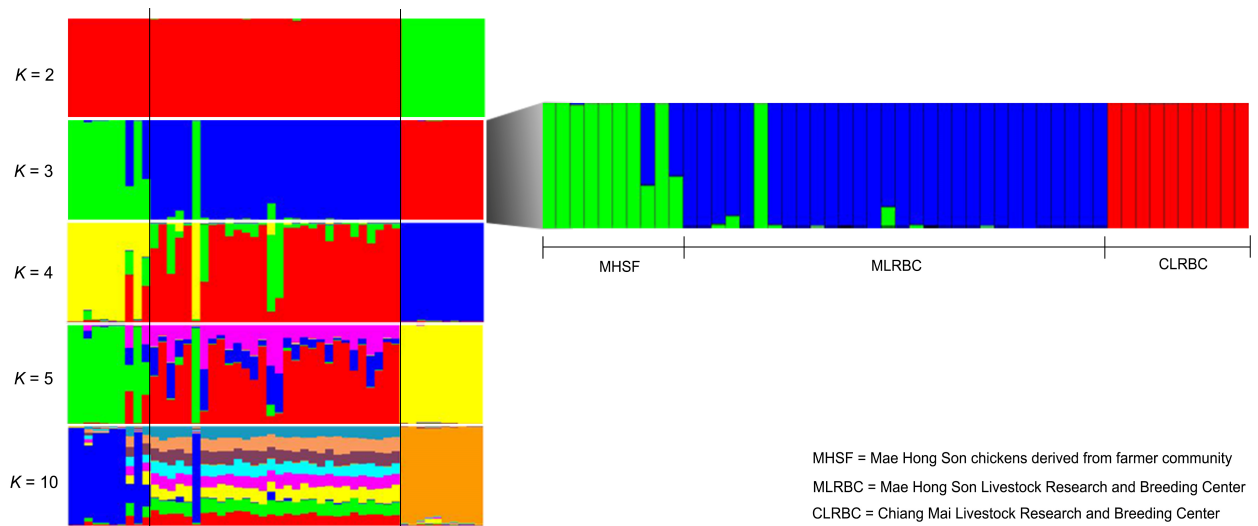

**Figure S10.** Population structure of Mae Hong Son chickens ( $n = 50$ ) (*Gallus gallus*, Linnaeus, 1758) [43]). Each vertical bar on the x-axis represents an individual chicken; the y-axis represents the proportion of membership (posterior probability) in each genetic cluster. Red junglefowl are superimposed on the plot with black vertical lines indicating the boundaries. Detailed information on each domestic chicken is presented in Table S1.



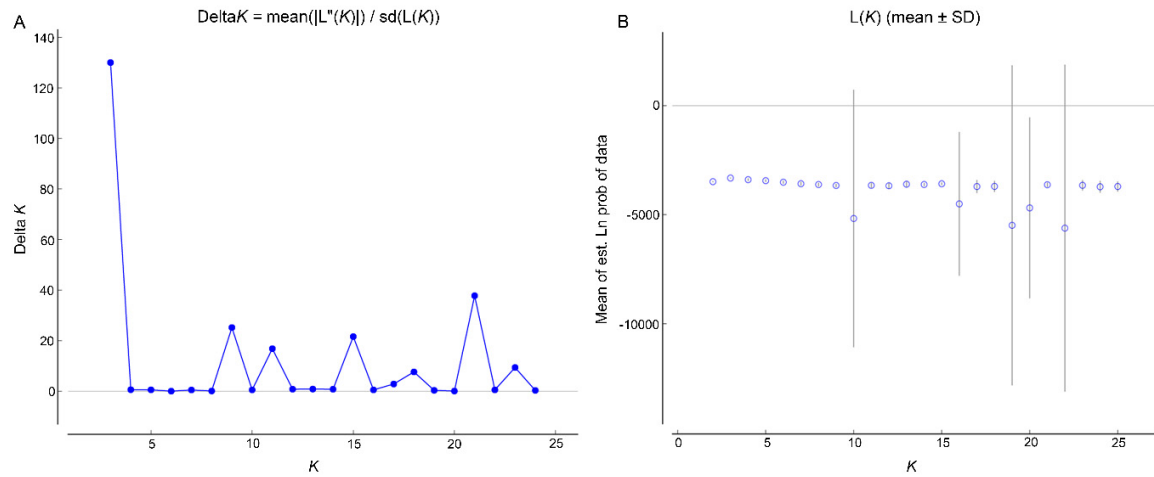

**Figure S11.** Different population structure patterns of Mae Hong Son chickens ( $n = 50$ ) (*Gallus gallus*, Linnaeus, 1758) [43] generated by the model-based Bayesian clustering algorithms implemented in STRUCTURE. (A) Plot of Evanno's  $\Delta K$  and (B) Plot of  $\ln P(K)$ .

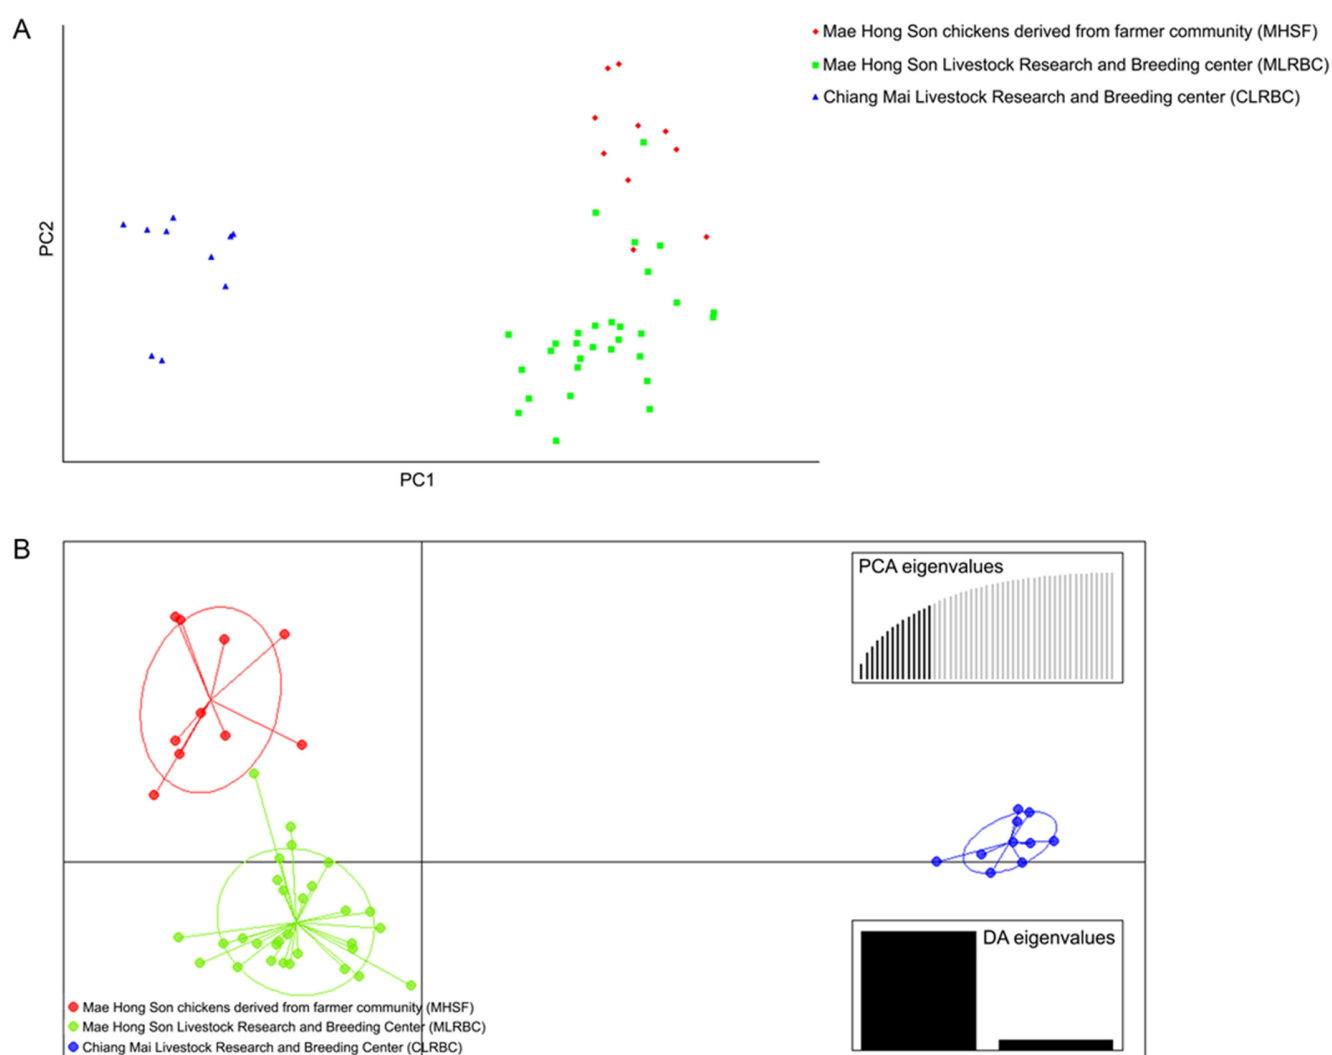

**Figure S12.** (A) Principal component analysis of Mae Hong Son chickens (*Gallus gallus*, Linnaeus, 1758) [43] and (B) Results of Discriminant Analysis of Principal Components (DAPC) of three indigenous chicken populations derived from the Mae Hong Son farmer community, Mae Hong Son, Thailand (MHSF), Mae Hong Son Livestock Research and Breeding Center, Mae Hong Son, Thailand (MLRBC), and Chiang Mai Livestock Research and Breeding Center, Chiang Mai, Thailand (CLRBC). Scatter plots based on the DAPC output for three assigned genetic clusters are indicated by different colors. Dots represent different individuals. Detailed information on each domestic chicken is presented in Table S1.

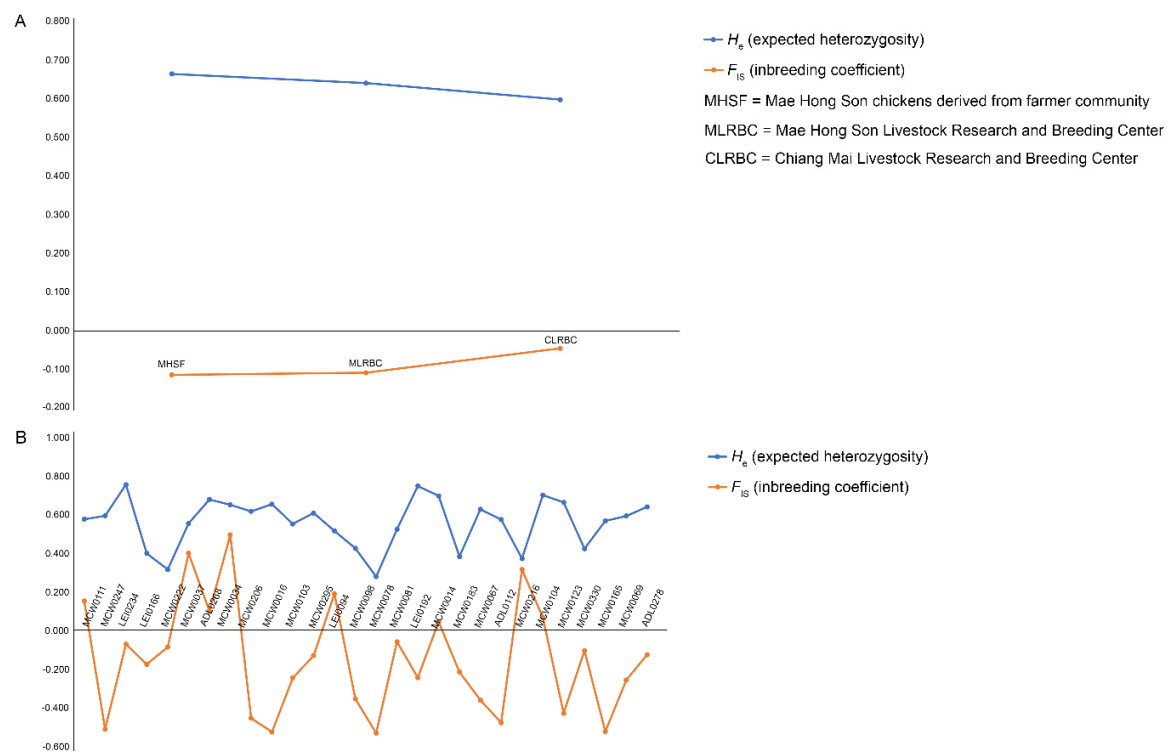

**Figure S13.** Mapping of expected heterozygosity ( $H_e$ ) against inbreeding coefficients ( $F_{is}$ ) along the length of the physical map. (A) Mae Hong Son chickens populations and (B) microsatellite loci.

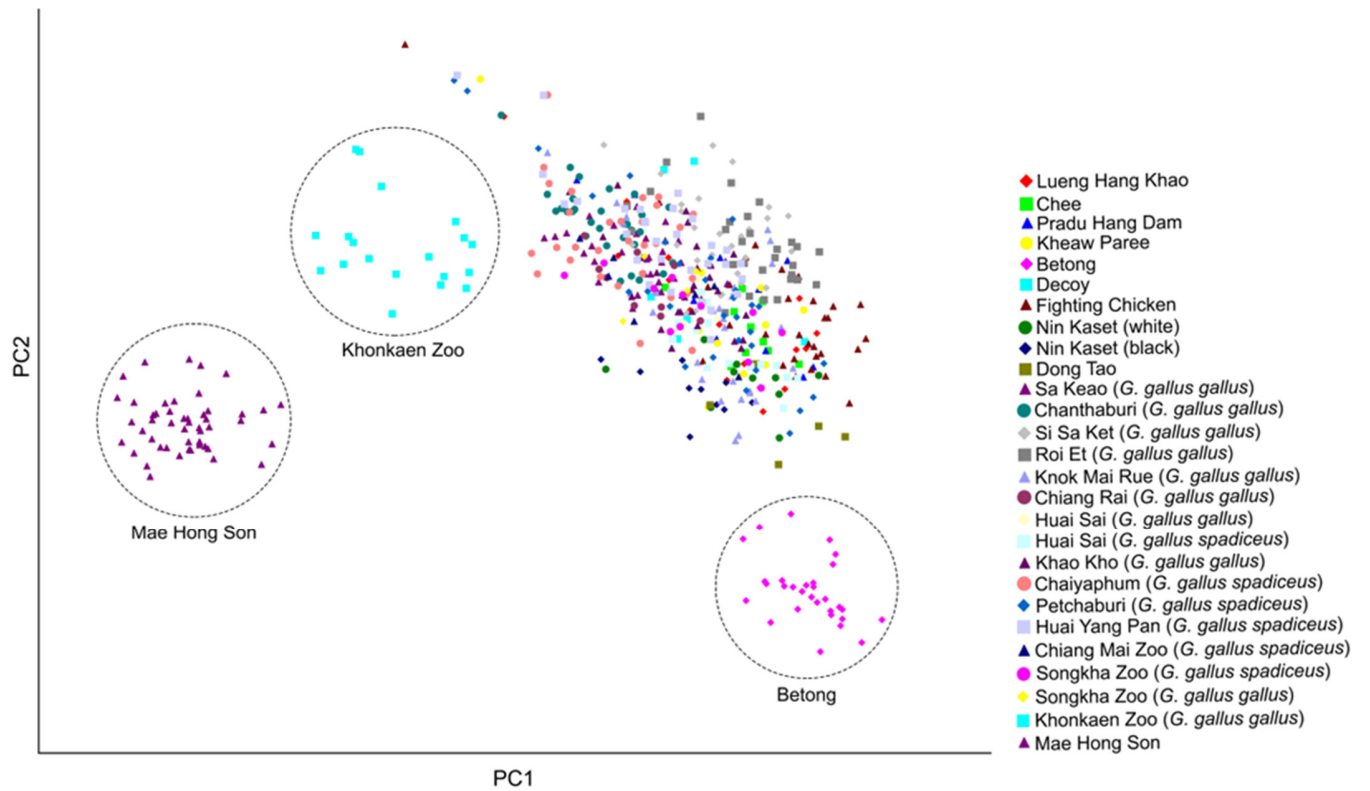

**Figure S14.** Principal component analysis of Mae Hong Son chickens (*Gallus gallus*, Linnaeus, 1758) [43] derived from the Mae Hong Son farmer community, Mae Hong Son, Thailand (MHSF), Mae Hong Son Livestock Research and Breeding Center, Mae Hong Son, Thailand (MLRBC), and Chiang Mai Livestock Research and Breeding Center, Chiang Mai, Thailand (CLRBC) with red junglefowl and domestic chicken breeds.

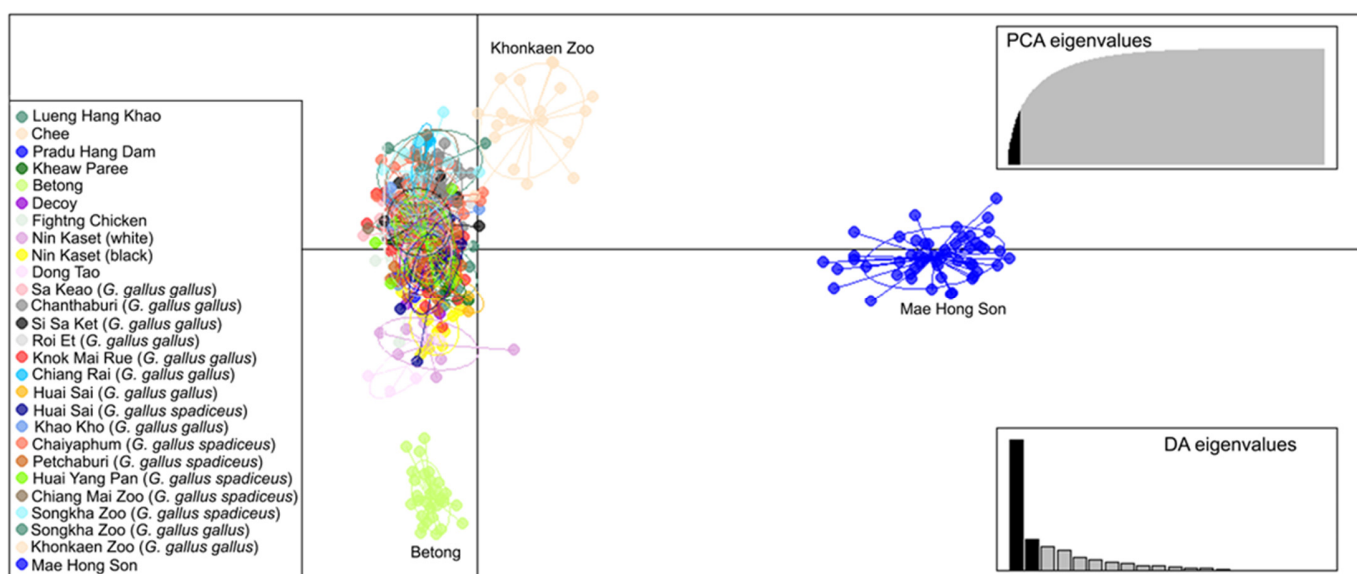

**Figure S15.** Discriminant Analysis of Principal Components (DAPC) of indigenous chicken populations derived from the Mae Hong Son farmer community, Mae Hong Son, Thailand (MHSF), Mae Hong Son Livestock Research and Breeding Center, Mae Hong Son, Thailand (MLRBC), and Chiang Mai Livestock Research and Breeding Center, Chiang Mai, Thailand (CLRBC) with red junglefowl and domestic breeds. Scatter plots based on the DAPC output for three assigned genetic clusters are indicated by different colors. Dots represent different individuals.

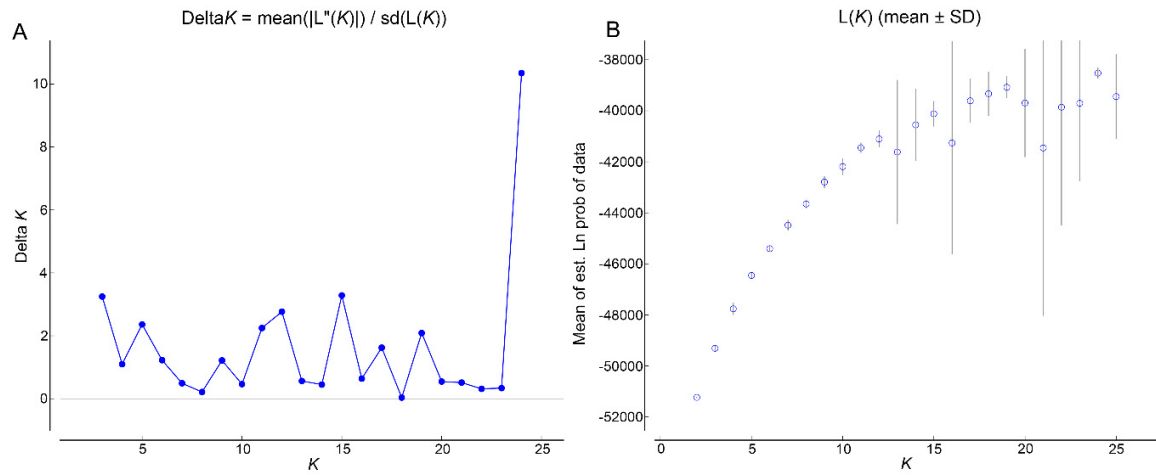

**Figure S16.** Different population structure patterns of Mae Hong Son chickens ( $n = 50$ ) (*Gallus gallus*, Linnaeus, 1758) [43], red junglefowl and domestic chicken breeds, generated by the model-based Bayesian clustering algorithms implemented in STRUCTURE. (A) Plot of Evanno's  $\Delta K$  and (B) Plot of  $\ln P(K)$ .

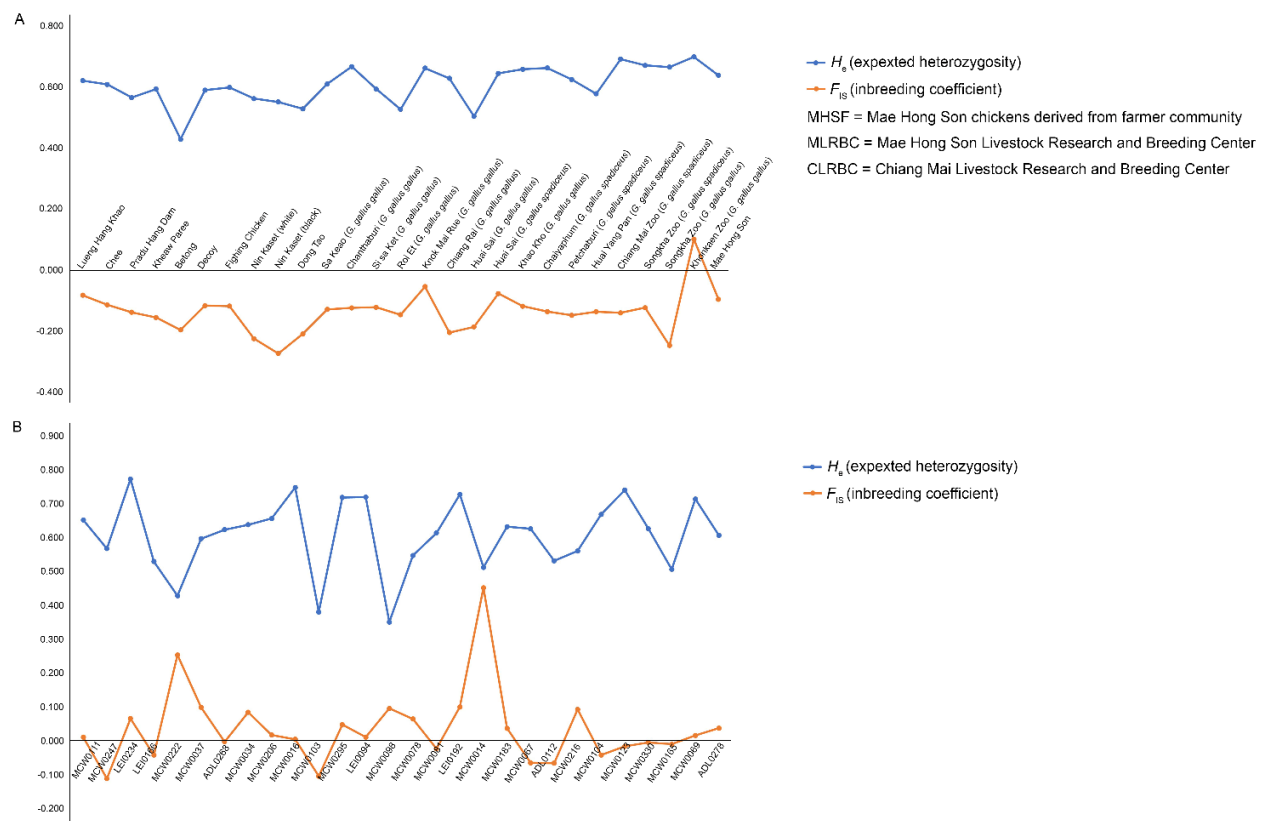

**Figure S17.** Mapping of expected heterozygosity ( $H_e$ ) against inbreeding coefficients ( $F_{is}$ ) along the length of the physical map. (A) Mae Hong Son chickens breed, red junglefowl and domestic chicken breeds and (B) microsatellite loci.



## 2.2 Supplementary Tables

**Table S1.** Detailed information on the specimens from three populations of Mae Hong Son chickens (*Gallus gallus*, Linnaeus, 1758) [43] in Thailand. All sequences were deposited in the DNA Data Bank of Japan (DDBJ).

| No. | Abbreviation/Code | Sex    | Locality                                                   | Mitochondrial D-loop DDBJ accession number | Haplogroup   |
|-----|-------------------|--------|------------------------------------------------------------|--------------------------------------------|--------------|
| 1   | MHS M1F           | Male   | Mae Hong Son chickens derived from farmer community, MHSF  | LC731861                                   | A            |
| 2   | MHS M2F           | Male   | Mae Hong Son chickens derived from farmer community, MHSF  | LC731862                                   | A            |
| 3   | MHS FM3F          | Female | Mae Hong Son chickens derived from farmer community, MHSF  | LC731863                                   | A            |
| 4   | MHS M4F           | Male   | Mae Hong Son chickens derived from farmer community, MHSF  | LC731864                                   | E            |
| 5   | MHS FM5F          | Female | Mae Hong Son chickens derived from farmer community, MHSF  | LC731865                                   | A            |
| 6   | MHS M6F           | Male   | Mae Hong Son chickens derived from farmer community, MHSF  | LC731866                                   | Unclassified |
| 7   | MHS M7F           | Male   | Mae Hong Son chickens derived from farmer community, MHSF  | LC731867                                   |              |
| 8   | MHS FM8F          | Female | Mae Hong Son chickens derived from farmer community, MHSF  | LC731868                                   |              |
| 9   | MHS FM9F          | Female | Mae Hong Son chickens derived from farmer community, MHSF  | LC731869                                   | E            |
| 10  | MHS FM10F         | Female | Mae Hong Son chickens derived from farmer community, MHSF  | LC731870                                   | F            |
| 11  | MHS M1            | Male   | Mae Hong Son Livestock Research and Breeding Center, MLRBC | LC731886                                   | F            |
| 12  | MHS M2            | Male   | Mae Hong Son Livestock Research and Breeding Center, MLRBC | LC731887                                   | E            |
| 13  | MHS M3            | Male   | Mae Hong Son Livestock Research and Breeding Center, MLRBC | LC731888                                   | E            |
| 14  | MHS M4            | Male   | Mae Hong Son Livestock Research and Breeding Center, MLRBC | LC731889                                   | F            |
| 15  | MHS M5            | Male   | Mae Hong Son Livestock Research and Breeding Center, MLRBC | LC731890                                   | F            |
| 16  | MHS M6            | Male   | Mae Hong Son Livestock Research and Breeding Center, MLRBC | LC731891                                   | E            |
| 17  | MHS M7            | Male   | Mae Hong Son Livestock Research and Breeding Center, MLRBC | LC731892                                   | E            |
| 18  | MHS M8            | Male   | Mae Hong Son Livestock Research and Breeding Center, MLRBC | LC731893                                   | F            |
| 19  | MHS M9            | Male   | Mae Hong Son Livestock Research and Breeding Center, MLRBC | LC731894                                   | F            |
| 20  | MHS M10           | Male   | Mae Hong Son Livestock Research and Breeding Center, MLRBC | LC731895                                   | B            |
| 21  | MHS M11           | Male   | Mae Hong Son Livestock Research and Breeding Center, MLRBC | LC731896                                   | F            |
| 22  | MHS M12           | Male   | Mae Hong Son Livestock Research and Breeding Center, MLRBC | LC731897                                   | F            |
| 23  | MHS M13           | Male   | Mae Hong Son Livestock Research and Breeding Center, MLRBC | LC731898                                   | F            |
| 24  | MHS M14           | Male   | Mae Hong Son Livestock Research and Breeding Center, MLRBC | LC731899                                   | F            |
| 25  | MHS M15           | Male   | Mae Hong Son Livestock Research and Breeding Center, MLRBC | LC731900                                   | E            |
| 26  | MHS FM1           | Female | Mae Hong Son Livestock Research and Breeding Center, MLRBC | LC731901                                   | E            |
| 27  | MHS FM2           | Female | Mae Hong Son Livestock Research and Breeding Center, MLRBC | LC731902                                   | E            |
| 28  | MHS FM3           | Female | Mae Hong Son Livestock Research and Breeding Center, MLRBC | LC731903                                   | B            |
| 29  | MHS FM4           | Female | Mae Hong Son Livestock Research and Breeding Center, MLRBC | LC731904                                   | F            |
| 30  | MHS FM5           | Female | Mae Hong Son Livestock Research and Breeding Center, MLRBC | LC731905                                   | F            |

|    |          |        |                                                            |          |   |
|----|----------|--------|------------------------------------------------------------|----------|---|
| 31 | MHS FM6  | Female | Mae Hong Son Livestock Research and Breeding Center, MLRBC | LC731906 | E |
| 32 | MHS FM7  | Female | Mae Hong Son Livestock Research and Breeding Center, MLRBC | LC731907 | B |
| 33 | MHS FM8  | Female | Mae Hong Son Livestock Research and Breeding Center, MLRBC | LC731908 | E |
| 34 | MHS FM9  | Female | Mae Hong Son Livestock Research and Breeding Center, MLRBC | LC731909 | E |
| 35 | MHS FM10 | Female | Mae Hong Son Livestock Research and Breeding Center, MLRBC | LC731910 | B |
| 36 | MHS FM11 | Female | Mae Hong Son Livestock Research and Breeding Center, MLRBC | LC731911 | B |
| 37 | MHS FM12 | Female | Mae Hong Son Livestock Research and Breeding Center, MLRBC | LC731912 | E |
| 38 | MHS FM13 | Female | Mae Hong Son Livestock Research and Breeding Center, MLRBC | LC731913 | F |
| 39 | MHS FM14 | Female | Mae Hong Son Livestock Research and Breeding Center, MLRBC | LC731914 | E |
| 40 | MHS FM15 | Female | Mae Hong Son Livestock Research and Breeding Center, MLRBC | LC731915 | F |
| 41 | MHS1     | Female | Chiang Mai Livestock Research and Breeding Center, CLRBC   | LC731871 | B |
| 42 | MHS2     | Female | Chiang Mai Livestock Research and Breeding Center, CLRBC   | LC731872 | B |
| 43 | MHS3     | Female | Chiang Mai Livestock Research and Breeding Center, CLRBC   | LC731873 | E |
| 44 | MHS4     | Female | Chiang Mai Livestock Research and Breeding Center, CLRBC   | LC731874 | F |
| 45 | MHS5     | Female | Chiang Mai Livestock Research and Breeding Center, CLRBC   | LC731875 | F |
| 46 | MHS6     | Female | Chiang Mai Livestock Research and Breeding Center, CLRBC   | LC731876 | E |
| 47 | MHS7     | Female | Chiang Mai Livestock Research and Breeding Center, CLRBC   | LC731877 | E |
| 48 | MHS8     | Female | Chiang Mai Livestock Research and Breeding Center, CLRBC   | LC731878 | E |
| 49 | MHS9     | Female | Chiang Mai Livestock Research and Breeding Center, CLRBC   | LC731879 | E |
| 50 | MHS10    | Female | Chiang Mai Livestock Research and Breeding Center, CLRBC   | LC731880 | B |

**Table S2.** Microsatellite primers and sequences of Mae Hong Son chickens specimens.

| Primer  | Chromosome | Annealing<br>temperate (°C) | Fluorescence | Primer sequence 5' to 3' |                          | Size (bp) |
|---------|------------|-----------------------------|--------------|--------------------------|--------------------------|-----------|
|         |            |                             |              | Forward                  | Reverse                  |           |
| ADL0268 | 1          | 58                          | Hex          | CTCCACCCCTCTCAGAACTA     | CAACTTCCCATCTACCTACT     | 106–127   |
| MCW0111 | 1          | 58                          | Hex          | GCTCCATGTGAAGTGGTTTA     | GCTCCATGTGAAGTGGTTTA     | 94–120    |
| MCW0247 | 1          | 58                          | Fam          | GTTGTTCAAAAAGAAGATGCATG  | TTGCATTAAGTGGGCACTTTC    | 208–222   |
| LEI0234 | 2          | 58                          | Hex          | ATGCATCAGATTGGTATTCAA    | CGTGGCTGTGAACAAATATG     | 218–373   |
| MCW0034 | 2          | 58                          | Hex          | ATCTTGAAACCTCACAAAGC     | TCTTCCAACCTATTTTTAGT     | 211–241   |
| MCW0206 | 2          | 58                          | Fam          | CTTGACAGTGATGCATTAAATG   | ACATCTAGAATTGACTGTTTAC   | 217–247   |
| LEI0166 | 3          | 58                          | Hex          | CTCCTGCCCTTAGCTACGCA     | TATCCCTGGCTGGGAGTTT      | 338–365   |
| MCW0222 | 3          | 58                          | Hex          | GCAGTTACATTGAAATGATTCC   | TTCTCAAAACACCTAGAAGAC    | 218–230   |
| MCW0016 | 3          | 58                          | Fam          | ATGGCGCAGAAGGCAAAGCGATAT | TGGCTTCTGAAGCAGTTGCTATGG | 126–177   |
| MCW0037 | 3          | 58                          | Fam          | ACCGGTGCCATCAATTACCTATTA | GAAAGCTCACATGACACTGCGAAA | 149–154   |
| MCW0103 | 3          | 58                          | Fam          | AACTGCGTTGAGAGTGAATGC    | TTTCCTAACTGGATGCTTCTG    | 263–270   |
| MCW0295 | 4          | 58                          | Fam          | ATCACTACAGAACCCCTCTC     | TATGTATGCACGCAGATATCC    | 82–111    |
| LEI0094 | 4          | 58                          | Hex          | GATCTCACCAGTATGAGCTGC    | TCTCACACTGTAACACAGTGC    | 243–281   |
| MCW0078 | 5          | 58                          | Hex          | CCACACGGAGAGGAGAAGGTCT   | TAGCATATGAGTGTACTGAGCTTC | 144–154   |
| MCW0098 | 4          | 58                          | Hex          | GGCTGCTTTGTGCTCTTCTCG    | CGATGGTCGTAATTCTCACGT    | 247–257   |
| MCW0081 | 5          | 58                          | Fam          | GTTGCTGAGAGCCTGGTGCAG    | CCTGTATGTGGAATTACTTCTC   | 107–146   |
| LEI0192 | 6          | 58                          | Hex          | TGCCAGAGCTTCAGTCTGT      | GTCATTACTGTTATGTTTATTGC  | 251–490   |
| MCW0014 | 6          | 58                          | Hex          | TATTGGCTCTAGGAAGTGC      | GAAATGAAGGTAAGACTAGC     | 169–202   |
| MCW0183 | 7          | 58                          | Hex          | ATCCCAGTGTCGAGTATCCGA    | TGAGATTTACTGGAGCCTGCC    | 293–361   |
| ADL0278 | 8          | 58                          | Hex          | CCAGCAGTCTACCTTCCTAT     | TGTCATCCAAGAACAGTGTG     | 118–136   |
| MCW0067 | 10         | 58                          | Fam          | GCACTACTGTGTGCTGCAGTTT   | GAGATGTAGTTGCCACATTCCGAC | 170–182   |
| ADL0112 | 10         | 58                          | Hex          | GGCTTAAGCTGACCCATTAT     | ATCTCAAATGTAATGCGTGC     | 132–142   |
| MCW0216 | 13         | 58                          | Hex          | GGGTTTTACAGGATGGGACG     | AGTTTCACTCCCAGGGCTCG     | 135–170   |
| MCW0104 | 13         | 58                          | Hex          | TAGCACAAGCTCAAGCTGTGAG   | AGACTTGCACAGCTGTGACC     | 194–249   |
| MCW0123 | 14         | 58                          | Hex          | CCACTAGAAAAGAACATCCTC    | GGCTGATGTAAGAAGGGATGA    | 84–106    |
| MCW0330 | 17         | 58                          | Hex          | TGGACCTCATCAGTCTGACAG    | AATGTTCTCATAGAGTTCCTGC   | 259–291   |
| MCW0165 | 23         | 58                          | Hex          | CAGACATGCATGCCAGATGA     | GATCCAGTCCTGCAGGCTGC     | 111–115   |
| MCW0069 | 26         | 58                          | Hex          | GCACTCGAGAAACTTCCTGCG    | ATTGCTTCAGCAAGCATGGGAGGA | 155–178   |

HEX = HEX<sup>TM</sup> Dye Phosphoramidite, FAM = 6-FAM (6-Carboxyfluorescein).

**Table S3.** Genetic differentiation between the three populations of Mae Hong Son chickens (*Gallus gallus*, Linnaeus, 1758) [43], based on the mitochondrial D-loop sequence.  $G_{ST}$ : Genetic differentiation coefficient,  $F_{ST}$ : Wright's  $F$ -statistics for subpopulations within the total population,  $\Phi_{ST}$ : from sequence and haplotype data,  $D_{xy}$ : the average number of nucleotide substitutions per site between populations, and  $D_a$ : net nucleotide substitutions per site between populations.

| Population 1       | Population 2       | $F_{ST}$            | $G_{ST}$ | $\Phi_{ST}$ | $D_{xy}$ | $D_a$ |
|--------------------|--------------------|---------------------|----------|-------------|----------|-------|
| MHSF <sup>1</sup>  | MLRBC <sup>2</sup> | 0.093*              | 0.021    | 0.001       | 0.010    | 0.002 |
| MHSF <sup>1</sup>  | CLRBC <sup>3</sup> | 0.017 <sup>ns</sup> | 0.029    | 0.001       | 0.009    | 0.001 |
| MLRBC <sup>2</sup> | CLRBC <sup>3</sup> | 0.127**             | 0.014    | 0.000       | 0.009    | 0.000 |

\*  $p < 0.05$ , \*\*  $p < 0.01$ , ns = not significant.

<sup>1</sup>MHSF = Mae Hong Son chickens derived from farmer community, Mae Hong Son.

<sup>2</sup>MLRBC = Mae Hong Son Livestock Research and Breeding Center, Mae Hong Son.

<sup>3</sup>CLRBC = Chiang Mai Livestock Research and Breeding Center, Chiang Mai.

**Table S4.** Neutrality tests of mitochondrial D-loop sequence of Mae Hong Son chickens (*Gallus gallus*, Linnaeus, 1758) [43].

| Population         | Tajima               | Fu $D^*$             | Fu $F^*$             | Fu's $F_s$           | Ewens-Watterson test | Chakraborty's test  | Ramos-Onsins and Rozas's $R_2$ | Raggedness index    |
|--------------------|----------------------|----------------------|----------------------|----------------------|----------------------|---------------------|--------------------------------|---------------------|
| MHSF <sup>1</sup>  | -0.121 <sup>ns</sup> | -0.516 <sup>ns</sup> | -0.487 <sup>ns</sup> | -3.126 <sup>*</sup>  | N.A.                 | 0.000 <sup>ns</sup> | 0.142                          | 0.079 <sup>ns</sup> |
| MLRBC <sup>2</sup> | -0.105 <sup>ns</sup> | -0.780 <sup>ns</sup> | -0.655 <sup>ns</sup> | -4.789 <sup>ns</sup> | 0.997 <sup>ns</sup>  | 0.039 <sup>ns</sup> | 0.113                          | 0.009 <sup>ns</sup> |
| CLRBC <sup>3</sup> | 0.189 <sup>ns</sup>  | 0.577 <sup>ns</sup>  | 0.511 <sup>ns</sup>  | -0.894 <sup>ns</sup> | 1.000 <sup>ns</sup>  | 0.022 <sup>ns</sup> | 0.163                          | 0.067 <sup>ns</sup> |
| All populations    | 0.030 <sup>ns</sup>  | -0.965 <sup>ns</sup> | -0.767 <sup>ns</sup> | -1.425 <sup>ns</sup> | 0.997 <sup>ns</sup>  | 0.057 <sup>ns</sup> | 0.103                          | 0.062 <sup>ns</sup> |

\* $p < 0.05$ , ns = not significant.

<sup>1</sup>MHSF = Mae Hong Son chickens derived from farmer community, Mae Hong Son.

<sup>2</sup>MLRBC = Mae Hong Son Livestock Research and Breeding Center, Mae Hong Son.

<sup>3</sup>CLRBC = Chiang Mai Livestock Research and Breeding Center, Chiang Mai.

**Table S5.** Pairwise differentiation of linkage disequilibrium of Mae Hong Son chickens (*Gallus gallus*, Linnaeus, 1758) [43] derived from Mae Hong Son farmer community, Mae Hong Son, Thailand (MHSF), based on 28 microsatellite loci. Numbers indicate *p*-values with 110 permutations.

| Locus   | MCW<br>0111 | MCW<br>0247 | LEI02<br>34 | LEI01<br>66 | MCW<br>0222 | MCW<br>0037 | ADL0<br>268 | MCW<br>0034 | MCW<br>0206 | MCW<br>0016 | MCW<br>0103 | MCW<br>0295 | LEI00<br>94 | MCW<br>0098 | MCW<br>0078 | MCW<br>0081 | LEI01<br>92 | MCW<br>0014 | MCW<br>0183 | MCW<br>0067 | ADL0<br>112 | MCW<br>0216 | MCW<br>0104 | MCW<br>0123 | MCW<br>0330 | MCW<br>0165 | MCW<br>0069 | ADL0<br>278 |
|---------|-------------|-------------|-------------|-------------|-------------|-------------|-------------|-------------|-------------|-------------|-------------|-------------|-------------|-------------|-------------|-------------|-------------|-------------|-------------|-------------|-------------|-------------|-------------|-------------|-------------|-------------|-------------|-------------|
| MCW0111 | 0.000       |             |             |             |             |             |             |             |             |             |             |             |             |             |             |             |             |             |             |             |             |             |             |             |             |             |             |             |
| MCW0247 | 0.247       | 0.000       |             |             |             |             |             |             |             |             |             |             |             |             |             |             |             |             |             |             |             |             |             |             |             |             |             |             |
| LEI0234 | 0.921       | 0.044       | 0.000       |             |             |             |             |             |             |             |             |             |             |             |             |             |             |             |             |             |             |             |             |             |             |             |             |             |
| LEI0166 | 0.067       | 0.064       | 0.132       | 0.000       |             |             |             |             |             |             |             |             |             |             |             |             |             |             |             |             |             |             |             |             |             |             |             |             |
| MCW0222 | 0.029       | 0.471       | 0.329       | 0.379       | 0.000       |             |             |             |             |             |             |             |             |             |             |             |             |             |             |             |             |             |             |             |             |             |             |             |
| MCW0037 | 0.911       | 0.589       | 0.616       | 0.364       | 0.552       | 0.000       |             |             |             |             |             |             |             |             |             |             |             |             |             |             |             |             |             |             |             |             |             |             |
| ADL0268 | 0.118       | 0.481       | 0.469       | 0.132       | 0.182       | 0.671       | 0.000       |             |             |             |             |             |             |             |             |             |             |             |             |             |             |             |             |             |             |             |             |             |
| MCW0034 | 0.054       | 0.490       | 0.769       | 0.801       | 0.126       | 0.971       | 0.383       | 0.000       |             |             |             |             |             |             |             |             |             |             |             |             |             |             |             |             |             |             |             |             |
| MCW0206 | 1.000       | 1.000       | 0.471       | 0.666       | 0.137       | 0.765       | 0.801       | 0.820       | 0.000       |             |             |             |             |             |             |             |             |             |             |             |             |             |             |             |             |             |             |             |
| MCW0016 | 0.055       | 0.004       | 0.153       | 0.128       | 0.747       | 0.767       | 0.246       | 0.209       | 1.000       | 0.000       |             |             |             |             |             |             |             |             |             |             |             |             |             |             |             |             |             |             |
| MCW0103 | 0.163       | 1.000       | 0.309       | 0.660       | 0.072       | 1.000       | 0.104       | 0.663       | 0.522       | 0.811       | 0.000       |             |             |             |             |             |             |             |             |             |             |             |             |             |             |             |             |             |
| MCW0295 | 0.082       | 0.094       | 0.594       | 0.023       | 0.539       | 0.048       | 0.195       | 0.255       | 0.759       | 0.139       | 1.000       | 0.000       |             |             |             |             |             |             |             |             |             |             |             |             |             |             |             |             |
| LEI0094 | 0.058       | 0.244       | 0.045       | 0.220       | 0.465       | 0.741       | 0.941       | 0.493       | 1.000       | 0.423       | 0.465       | 0.178       | 0.000       |             |             |             |             |             |             |             |             |             |             |             |             |             |             |             |
| MCW0098 | 0.553       | 0.717       | 0.156       | 0.781       | 0.301       | 0.289       | 0.689       | 0.716       | 0.546       | 0.926       | 0.570       | 0.300       | 0.032       | 0.000       |             |             |             |             |             |             |             |             |             |             |             |             |             |             |
| MCW0078 | 0.081       | 1.000       | 0.607       | 0.412       | 0.723       | 0.100       | 0.334       | 0.748       | 0.720       | 0.082       | 0.166       | 0.269       | 0.419       | 0.587       | 0.000       |             |             |             |             |             |             |             |             |             |             |             |             |             |
| MCW0081 | 0.276       | 0.900       | 0.912       | 1.000       | 0.452       | 0.456       | 0.119       | 0.876       | 1.000       | 1.000       | 0.597       | 0.914       | 0.906       | 0.041       | 0.664       | 0.000       |             |             |             |             |             |             |             |             |             |             |             |             |
| LEI0192 | 0.411       | 0.765       | 0.267       | 0.914       | 0.511       | 0.502       | 0.133       | 0.292       | 1.000       | 0.638       | 0.719       | 0.510       | 0.767       | 0.098       | 0.892       | 0.045       | 0.000       |             |             |             |             |             |             |             |             |             |             |             |
| MCW0014 | 0.480       | 1.000       | 0.185       | 0.537       | 0.474       | 1.000       | 0.458       | 0.480       | 0.418       | 1.000       | 1.000       | 0.470       | 0.240       | 0.224       | 1.000       | 0.477       | 0.202       | 0.000       |             |             |             |             |             |             |             |             |             |             |
| MCW0183 | 0.098       | 0.299       | 0.409       | 0.196       | 1.000       | 1.000       | 0.403       | 1.000       | 1.000       | 0.402       | 0.402       | 0.203       | 0.102       | 1.000       | 0.224       | 1.000       | 1.000       | 0.295       | 0.000       |             |             |             |             |             |             |             |             |             |
| MCW0067 | 0.634       | 0.471       | 0.349       | 1.000       | 0.234       | 0.208       | 0.476       | 0.811       | 0.103       | 0.584       | 0.102       | 0.866       | 0.475       | 0.212       | 1.000       | 0.642       | 0.376       | 0.776       | 1.000       | 0.000       |             |             |             |             |             |             |             |             |
| ADL0112 | 0.208       | 0.532       | 0.129       | 0.371       | 0.382       | 1.000       | 0.729       | 0.397       | 0.669       | 0.656       | 0.668       | 0.387       | 0.069       | 0.454       | 0.418       | 1.000       | 0.908       | 0.069       | 0.197       | 1.000       | 0.000       |             |             |             |             |             |             |             |
| MCW0216 | 0.234       | 0.886       | 0.895       | 1.000       | 0.901       | 0.362       | 0.619       | 0.476       | 0.494       | 0.957       | 0.472       | 0.894       | 0.885       | 0.524       | 0.778       | 0.163       | 0.471       | 0.797       | 1.000       | 0.750       | 1.000       | 0.000       |             |             |             |             |             |             |
| MCW0104 | 1.000       | 0.871       | 0.826       | 0.719       | 0.624       | 0.174       | 1.000       | 1.000       | 0.874       | 1.000       | 1.000       | 0.633       | 1.000       | 1.000       | 1.000       | 0.238       | 1.000       | 1.000       | 1.000       | 1.000       | 1.000       | 0.165       | 0.000       |             |             |             |             |             |
| MCW0123 | 0.337       | 1.000       | 0.163       | 0.776       | 0.829       | 0.297       | 0.231       | 0.712       | 0.551       | 1.000       | 0.118       | 0.830       | 0.393       | 0.093       | 0.280       | 0.114       | 0.540       | 1.000       | 1.000       | 0.504       | 1.000       | 0.026       | 0.170       | 0.000       |             |             |             |             |
| MCW0330 | 0.830       | 0.033       | 0.076       | 0.135       | 1.000       | 1.000       | 0.850       | 1.000       | 1.000       | 0.062       | 0.577       | 0.219       | 0.664       | 1.000       | 1.000       | 0.830       | 0.712       | 1.000       | 0.399       | 1.000       | 0.670       | 0.487       | 1.000       | 0.572       | 0.000       |             |             |             |
| MCW0165 | 0.125       | 0.378       | 0.378       | 1.000       | 0.726       | 0.391       | 0.656       | 0.672       | 0.666       | 0.382       | 0.067       | 0.438       | 0.411       | 1.000       | 0.905       | 0.073       | 0.200       | 1.000       | 0.020       | 1.000       | 1.000       | 1.000       | 0.668       | 0.137       | 0.735       | 0.000       |             |             |
| MCW0069 | 0.137       | 0.735       | 0.830       | 0.421       | 0.229       | 0.221       | 0.459       | 0.308       | 0.577       | 0.867       | 0.277       | 0.741       | 1.000       | 0.165       | 0.554       | 0.057       | 0.029       | 0.731       | 1.000       | 0.915       | 0.860       | 0.071       | 0.117       | 0.037       | 0.275       | 0.857       | 0.000       |             |
| ADL0278 | 0.691       | 0.967       | 1.000       | 0.805       | 0.794       | 0.243       | 0.229       | 0.523       | 0.166       | 1.000       | 1.000       | 0.789       | 0.965       | 0.308       | 1.000       | 0.159       | 1.000       | 0.961       | 1.000       | 1.000       | 0.784       | 0.691       | 0.580       | 0.100       | 0.562       | 0.806       | 0.110       | 0.000       |

**Table S6.** Pairwise differentiation of linkage disequilibrium of Mae Hong Son chickens (*Gallus gallus*, Linnaeus, 1758) [43] from Mae Hong Son Livestock Research and Breeding Center, Mae Hong Son, Thailand (MLRBC), based on 28 microsatellite loci. Numbers indicate *p*-values with 110 permutations.

| Locus   | MCW<br>0111 | MCW<br>0247 | LEI02<br>34 | LEI01<br>66 | MCW<br>0222 | MCW<br>0037 | ADL0<br>268 | MCW<br>0034 | MCW<br>0206 | MCW<br>0016 | MCW<br>0103 | MCW<br>0295 | LEI00<br>94 | MCW<br>0098 | MCW<br>0078 | MCW<br>0081 | LEI01<br>92 | MCW<br>0014 | MCW<br>0183 | MCW<br>0067 | ADL0<br>112 | MCW<br>0216 | MCW<br>0104 | MCW<br>0123 | MCW<br>0330 | MCW<br>0165 | MCW<br>0069 | ADL0<br>278 |
|---------|-------------|-------------|-------------|-------------|-------------|-------------|-------------|-------------|-------------|-------------|-------------|-------------|-------------|-------------|-------------|-------------|-------------|-------------|-------------|-------------|-------------|-------------|-------------|-------------|-------------|-------------|-------------|-------------|
| MCW0111 | 0.000       |             |             |             |             |             |             |             |             |             |             |             |             |             |             |             |             |             |             |             |             |             |             |             |             |             |             |             |
| MCW0247 | 0.831       | 0.000       |             |             |             |             |             |             |             |             |             |             |             |             |             |             |             |             |             |             |             |             |             |             |             |             |             |             |
| LEI0234 | 0.676       | 0.765       | 0.000       |             |             |             |             |             |             |             |             |             |             |             |             |             |             |             |             |             |             |             |             |             |             |             |             |             |
| LEI0166 | 0.254       | 0.617       | 0.527       | 0.000       |             |             |             |             |             |             |             |             |             |             |             |             |             |             |             |             |             |             |             |             |             |             |             |             |
| MCW0222 | .0.188      | 0.658       | 0.127       | 0.285       | 0.000       |             |             |             |             |             |             |             |             |             |             |             |             |             |             |             |             |             |             |             |             |             |             |             |
| MCW0037 | 0.918       | 0.616       | 0.639       | 0.718       | 0.643       | 0.000       |             |             |             |             |             |             |             |             |             |             |             |             |             |             |             |             |             |             |             |             |             |             |
| ADL0268 | 0.933       | 0.210       | 0.121       | 0.354       | 0.185       | 0.490       | 0.000       |             |             |             |             |             |             |             |             |             |             |             |             |             |             |             |             |             |             |             |             |             |
| MCW0034 | 0.781       | 0.296       | 0.274       | 0.607       | 0.289       | 0.488       | 0.325       | 0.000       |             |             |             |             |             |             |             |             |             |             |             |             |             |             |             |             |             |             |             |             |
| MCW0206 | 0.952       | 0.149       | 0.370       | 0.523       | 0.470       | 0.404       | 0.351       | 0.243       | 0.000       |             |             |             |             |             |             |             |             |             |             |             |             |             |             |             |             |             |             |             |
| MCW0016 | 0.868       | 0.249       | 0.766       | 0.001       | 0.205       | 0.003       | 0.721       | 0.726       | 0.701       | 0.000       |             |             |             |             |             |             |             |             |             |             |             |             |             |             |             |             |             |             |
| MCW0103 | 0.461       | 0.611       | 0.707       | 0.870       | 0.380       | 0.458       | 0.204       | 0.851       | 0.594       | 0.396       | 0.000       |             |             |             |             |             |             |             |             |             |             |             |             |             |             |             |             |             |
| MCW0295 | 0.103       | 0.426       | 0.0313      | 0.055       | 0.094       | 0.635       | 0.578       | 0.878       | 0.703       | 0.249       | 0.846       | 0.000       |             |             |             |             |             |             |             |             |             |             |             |             |             |             |             |             |
| LEI0094 | 0.217       | 0.973       | 0.341       | 0.824       | 0.545       | 0.643       | 0.876       | 0.446       | 0.630       | 0.087       | 0.442       | 0.303       | 0.000       |             |             |             |             |             |             |             |             |             |             |             |             |             |             |             |
| MCW0098 | 0.331       | 0.849       | 0.241       | 0.209       | 0.022       | 0.105       | 0.120       | 0.058       | 0.045       | 0.431       | 0.851       | 0.099       | 0.227       | 0.000       |             |             |             |             |             |             |             |             |             |             |             |             |             |             |
| MCW0078 | 0.374       | 0.488       | 0.083       | 0.551       | 0.028       | 0.285       | 0.142       | 0.222       | 0.814       | 0.755       | 1.000       | 0.885       | 0.717       | 1.000       | 0.000       |             |             |             |             |             |             |             |             |             |             |             |             |             |
| MCW0081 | 0.775       | 0.010       | 0.145       | 0.929       | 0.252       | 0.526       | 0.099       | 0.055       | 0.514       | 0.602       | 0.485       | 0.849       | 0.817       | 0.515       | 0.020       | 0.000       |             |             |             |             |             |             |             |             |             |             |             |             |
| LEI0192 | 0.140       | 0.960       | 0.179       | 0.786       | 0.432       | 0.665       | 0.336       | 0.597       | 0.835       | 0.227       | 0.229       | 0.241       | 0.077       | 0.899       | 0.434       | 0.815       | 0.000       |             |             |             |             |             |             |             |             |             |             |             |
| MCW0014 | 0.473       | 0.680       | 0.085       | 0.212       | 0.614       | 0.658       | 0.247       | 0.590       | 0.916       | 0.363       | 0.998       | 0.216       | 0.281       | 0.911       | 0.090       | 0.010       | 0.538       | 0.000       |             |             |             |             |             |             |             |             |             |             |
| MCW0183 | 0.243       | 0.919       | 0.323       | 0.542       | 0.892       | 0.615       | 0.998       | 0.740       | 0.254       | 0.250       | 0.483       | 0.921       | 0.445       | 0.645       | 1.000       | 0.067       | 0.577       | 0.627       | 0.000       |             |             |             |             |             |             |             |             |             |
| MCW0067 | 0.941       | 0.415       | 0.882       | 0.962       | 0.190       | 0.254       | 0.045       | 0.272       | 0.621       | 0.931       | 0.649       | 0.933       | 0.381       | 0.461       | 0.356       | 0.672       | 0.230       | 0.593       | 0.993       | 0.000       |             |             |             |             |             |             |             |             |
| ADL0112 | 0.942       | 0.810       | 0.022       | 0.901       | 0.290       | 0.167       | 0.348       | 0.714       | 0.751       | 0.427       | 0.340       | 0.689       | 0.243       | 0.823       | 0.226       | 0.047       | 0.176       | 0.490       | 0.304       | 0.514       | 0.000       |             |             |             |             |             |             |             |
| MCW0216 | 0.784       | 0.303       | 0.551       | 0.740       | 0.293       | 0.585       | 0.741       | 0.194       | 0.475       | 0.743       | 0.048       | 0.774       | 0.551       | 0.511       | 0.080       | 0.225       | 0.597       | 0.160       | 0.055       | 0.787       | 0.831       | 0.000       |             |             |             |             |             |             |
| MCW0104 | 0.684       | 0.445       | 1.000       | 0.983       | 0.865       | 0.837       | 1.000       | 0.475       | 0.994       | 0.738       | 0.859       | 0.483       | 0.055       | 0.044       | 0.969       | 0.901       | 0.450       | 0.333       | 0.066       | 0.891       | 0.773       | 0.480       | 0.000       |             |             |             |             |             |
| MCW0123 | 0.772       | 0.169       | 0.093       | 0.588       | 0.744       | 0.362       | 0.141       | 0.945       | 1.000       | 0.431       | 1.000       | 0.620       | 0.115       | 0.674       | 1.000       | 0.385       | 0.402       | 0.403       | 0.438       | 0.499       | 0.763       | 0.700       | 0.033       | 0.000       |             |             |             |             |
| MCW0330 | 0.550       | 1.000       | 0.491       | 0.160       | 0.270       | 0.405       | 0.701       | 0.914       | 0.628       | 0.905       | 0.798       | 0.094       | 0.482       | 0.036       | 1.000       | 0.973       | 0.255       | 0.341       | 0.299       | 0.863       | 0.931       | 0.706       | 0.575       | 0.581       | 0.000       |             |             |             |
| MCW0165 | 0.983       | 0.951       | 0.026       | 0.664       | 0.470       | 0.253       | 0.553       | 0.577       | 0.860       | 0.521       | 0.516       | 0.677       | 0.310       | 0.827       | 0.121       | 0.202       | 0.396       | 0.696       | 0.340       | 0.614       | 0.000       | 0.978       | 0.195       | 0.674       | 0.745       | 0.000       |             |             |
| MCW0069 | 0.074       | 0.690       | 0.736       | 0.060       | 0.203       | 0.914       | 0.946       | 0.777       | 0.254       | 0.706       | 0.201       | 0.742       | 0.768       | 0.867       | 1.000       | 0.904       | 0.834       | 0.975       | 0.967       | 0.581       | 0.432       | 0.682       | 1.000       | 0.771       | 0.642       | 0.397       | 0.000       |             |
| ADL0278 | 0.943       | 0.081       | 0.976       | 0.191       | 0.843       | 0.210       | 0.157       | 0.860       | 0.281       | 0.863       | 0.317       | 0.534       | 0.651       | 0.687       | 0.770       | 0.594       | 0.292       | 0.578       | 0.974       | 0.347       | 0.313       | 0.701       | 0.712       | 0.104       | 0.328       | 0.277       | 0.146       | 0.000       |



**Table S7.** Pairwise differentiation of linkage disequilibrium of Mae Hong Son chickens (*Gallus gallus*, Linnaeus, 1758) [43] from Chiang Mai Livestock Research and Breeding Center, Chiang Mai, Thailand (CLRBC), based on 28 microsatellite loci. Numbers indicate *p*-values with 110 permutations.

| Locus   | MCW0111 | MCW0247 | LEI0234 | LEI0166 | MCW0222 | MCW0037 | ADL0268 | MCW0034 | MCW0206 | MCW0016 | MCW0103 | MCW0295 | LEI0094 | MCW0098 | MCW0078 | MCW0081 | LEI0192 | MCW0014 | MCW0183 | MCW0067 | ADL0112 | MCW0216 | MCW0104 | MCW0123 | MCW0330 | MCW0165 | MCW0069 | ADL0278 |
|---------|---------|---------|---------|---------|---------|---------|---------|---------|---------|---------|---------|---------|---------|---------|---------|---------|---------|---------|---------|---------|---------|---------|---------|---------|---------|---------|---------|---------|
| MCW0111 | 0.000   |         |         |         |         |         |         |         |         |         |         |         |         |         |         |         |         |         |         |         |         |         |         |         |         |         |         |         |
| MCW0247 | 0.157   | 0.000   |         |         |         |         |         |         |         |         |         |         |         |         |         |         |         |         |         |         |         |         |         |         |         |         |         |         |
| LEI0234 | 0.340   | 0.050   | 0.000   |         |         |         |         |         |         |         |         |         |         |         |         |         |         |         |         |         |         |         |         |         |         |         |         |         |
| LEI0166 | 0.085   | 0.674   | 0.112   | 0.000   |         |         |         |         |         |         |         |         |         |         |         |         |         |         |         |         |         |         |         |         |         |         |         |         |
| MCW0222 | 0.534   | 0.598   | 0.104   | 0.611   | 0.000   |         |         |         |         |         |         |         |         |         |         |         |         |         |         |         |         |         |         |         |         |         |         |         |
| MCW0037 | 0.234   | 0.017   | 0.002   | 0.081   | 0.064   | 0.000   |         |         |         |         |         |         |         |         |         |         |         |         |         |         |         |         |         |         |         |         |         |         |
| ADL0268 | 0.063   | 0.307   | 0.010   | 0.028   | 0.202   | 0.045   | 0.000   |         |         |         |         |         |         |         |         |         |         |         |         |         |         |         |         |         |         |         |         |         |
| MCW0034 | 0.580   | 0.363   | 0.879   | 0.44    | 0.777   | 1.000   | 0.177   | 0.000   |         |         |         |         |         |         |         |         |         |         |         |         |         |         |         |         |         |         |         |         |
| MCW0206 | 0.475   | 0.624   | 0.333   | 0.499   | 1.000   | 0.598   | 0.598   | 0.003   | 0.000   |         |         |         |         |         |         |         |         |         |         |         |         |         |         |         |         |         |         |         |
| MCW0016 | 0.133   | 0.425   | 0.015   | 0.055   | 0.470   | 0.004   | 0.036   | 0.900   | 0.299   | 0.000   |         |         |         |         |         |         |         |         |         |         |         |         |         |         |         |         |         |         |
| MCW0103 | 0.065   | 0.756   | 0.114   | 0.027   | 0.220   | 0.032   | 0.034   | 0.799   | 0.237   | 0.044   | 0.000   |         |         |         |         |         |         |         |         |         |         |         |         |         |         |         |         |         |
| MCW0295 | 0.331   | 0.558   | 0.362   | 0.724   | 0.327   | 0.766   | 0.227   | 1.000   | 1.000   | 0.421   | 0.531   | 0.000   |         |         |         |         |         |         |         |         |         |         |         |         |         |         |         |         |
| LEI0094 | 0.476   | 0.765   | 0.294   | 0.288   | 1.000   | 0.540   | 0.107   | 0.508   | 0.165   | 0.217   | 0.163   | 0.725   | 0.000   |         |         |         |         |         |         |         |         |         |         |         |         |         |         |         |
| MCW0098 | 0.531   | 0.600   | 0.112   | 0.613   | 1.000   | 0.065   | 0.420   | 1.000   | 0.535   | 0.045   | 0.687   | 0.552   | 0.659   | 0.000   |         |         |         |         |         |         |         |         |         |         |         |         |         |         |
| MCW0078 | 0.531   | 0.601   | 0.110   | 0.611   | 1.000   | 0.065   | 0.417   | 1.000   | 0.532   | 0.042   | 0.683   | 0.558   | 0.666   | 0.021   | 0.000   |         |         |         |         |         |         |         |         |         |         |         |         |         |
| MCW0081 | 0.032   | 0.206   | 0.016   | 0.028   | 0.463   | 0.064   | 0.014   | 0.523   | 0.297   | 0.051   | 0.042   | 0.203   | 0.748   | 0.4630  | 0.466   | 0.000   |         |         |         |         |         |         |         |         |         |         |         |         |
| LEI0192 | 0.228   | 0.520   | 0.003   | 0.553   | 0.062   | 0.014   | 0.133   | 0.961   | 0.032   | 0.135   | 0.266   | 0.658   | 0.541   | 0.064   | 0.063   | 0.118   | 0.000   |         |         |         |         |         |         |         |         |         |         |         |
| MCW0014 | 0.130   | 0.008   | 0.009   | 0.026   | 0.288   | 0.001   | 0.155   | 0.664   | 0.731   | 0.028   | 0.022   | 1.000   | 0.615   | 0.292   | 0.288   | 0.030   | 0.049   | 0.000   |         |         |         |         |         |         |         |         |         |         |
| MCW0183 | 0.096   | 0.015   | 0.001   | 0.057   | 0.460   | 0.011   | 0.042   | 0.344   | 0.231   | 0.064   | 0.068   | 0.768   | 0.396   | 0.455   | 0.462   | 0.004   | 0.020   | 0.001   | 0.000   |         |         |         |         |         |         |         |         |         |
| MCW0067 | 0.800   | 0.004   | 0.016   | 0.666   | 0.469   | 0.061   | 0.255   | 0.333   | 0.128   | 0.422   | 0.668   | 0.433   | 0.738   | 0.471   | 0.468   | 0.055   | 0.128   | 0.028   | 0.003   | 0.000   |         |         |         |         |         |         |         |         |
| ADL0112 | 0.441   | 0.216   | 0.007   | 0.504   | 0.279   | 0.046   | 0.350   | 1.000   | 0.141   | 0.025   | 1.000   | 0.134   | 1.000   | 0.113   | 0.114   | 0.024   | 0.084   | 0.198   | 0.045   | 0.030   | 0.000   |         |         |         |         |         |         |         |
| MCW0216 | N/A     | 0.000   |         |         |         |         |         |         |
| MCW0104 | 1.000   | 1.000   | 0.331   | N/A     | N/A     | N/A     | 0.331   | N/A     | 0.331   | 0.332   | N/A     | 0.333   | 0.336   | 0.331   | N/A     | 0.000   |         |         |         |         |         |
| MCW0123 | 0.333   | 0.158   | 0.001   | 0.168   | 0.113   | 0.004   | 0.027   | 0.784   | 0.332   | 0.018   | 0.203   | 0.272   | 0.219   | 0.111   | 0.109   | 0.019   | 0.014   | 0.010   | 0.004   | 0.019   | 0.020   | N/A     | 0.330   | 0.000   |         |         |         |         |
| MCW0330 | 0.795   | 0.206   | 0.015   | 0.666   | 0.044   | 0.068   | 0.015   | 0.684   | 0.799   | 0.432   | 0.298   | 0.036   | 0.905   | 0.469   | 0.464   | 0.050   | 0.125   | 0.224   | 0.070   | 0.054   | 0.028   | N/A     | 0.0332  | 0.014   | 0.000   |         |         |         |
| MCW0165 | 1.000   | 0.004   | 0.048   | 0.500   | 0.467   | 0.019   | 0.595   | 0.614   | 0.500   | 0.221   | 0.472   | 0.808   | 0.808   | 0.466   | 0.466   | 0.217   | 0.276   | 0.010   | 0.020   | 0.004   | 0.129   | N/A     | N/A     | 0.050   | 0.222   | 0.000   |         |         |
| MCW0069 | 0.533   | 0.067   | 0.104   | 1.000   | 1.000   | 1.000   | 0.137   | 0.566   | 1.000   | 1.000   | 1.000   | 0.130   | 1.000   | 1.000   | 1.000   | 0.048   | 1.000   | 0.649   | 0.064   | 0.045   | 0.027   | N/A     | 0.328   | 0.485   | 0.046   | 0.128   | 0.000   |         |
| ADL0278 | 0.231   | 0.017   | 0.004   | 0.085   | 0.066   | 0.0002  | 0.042   | 1.000   | 0.599   | 0.005   | 0.029   | 0.778   | 0.549   | 0.068   | 0.065   | 0.063   | 0.012   | 0.002   | 0.011   | 0.066   | 0.045   | N/A     | N/A     | 0.003   | 0.068   | 0.019   | 1.000   | 0.000   |

**Table S8.** Genetic diversity of Mae Hong Son chickens ( $n = 50$ ) (*Gallus gallus*, Linnaeus, 1758) [43], based on 28 microsatellite loci. Detailed information on each individual chicken is presented in Table S1.

| Populations       | Locus   | N  | $N_a$ | $AR$  | $N_{ea}$ | $I$   | $H_o$ | $H_e$ | $M\ ratio$ | $PIC$ | $F$    |
|-------------------|---------|----|-------|-------|----------|-------|-------|-------|------------|-------|--------|
| MHSF <sup>1</sup> | MCW0111 | 10 | 5.000 | 4.900 | 3.448    | 1.400 | 0.800 | 0.710 | 0.357      | 0.670 | -0.127 |
|                   | MCW0247 | 10 | 4.000 | 3.895 | 2.667    | 1.106 | 1.000 | 0.625 | 0.667      | 0.551 | -0.600 |
|                   | LEI0234 | 10 | 6.000 | 5.695 | 3.030    | 1.373 | 0.900 | 0.670 | 0.042      | 0.628 | -0.343 |
|                   | LEI0166 | 10 | 3.000 | 2.800 | 1.227    | 0.394 | 0.200 | 0.185 | 0.300      | 0.177 | -0.081 |
|                   | MCW0222 | 10 | 3.000 | 2.900 | 2.151    | 0.845 | 0.600 | 0.535 | 0.500      | 0.436 | -0.121 |
|                   | MCW0037 | 10 | 3.000 | 2.995 | 2.020    | 0.857 | 0.300 | 0.505 | 0.750      | 0.442 | 0.406  |
|                   | ADL0268 | 10 | 4.000 | 4.000 | 3.774    | 1.354 | 0.800 | 0.735 | 0.667      | 0.685 | -0.088 |
|                   | MCW0034 | 10 | 3.000 | 3.000 | 2.597    | 1.010 | 0.400 | 0.615 | 0.150      | 0.534 | 0.350  |
|                   | MCW0206 | 10 | 5.000 | 4.895 | 3.509    | 1.392 | 1.000 | 0.715 | 0.313      | 0.668 | -0.399 |
|                   | MCW0016 | 10 | 4.000 | 3.989 | 2.899    | 1.187 | 1.000 | 0.655 | 0.286      | 0.592 | -0.527 |
|                   | MCW0103 | 10 | 3.000 | 3.000 | 2.632    | 1.030 | 1.000 | 0.620 | 0.750      | 0.548 | -0.613 |
|                   | MCW0295 | 10 | 3.000 | 3.000 | 1.869    | 0.819 | 0.400 | 0.465 | 0.500      | 0.420 | 0.140  |
|                   | LEI0094 | 10 | 3.000 | 2.895 | 1.361    | 0.518 | 0.300 | 0.265 | 0.214      | 0.247 | -0.132 |
|                   | MCW0098 | 10 | 2.000 | 2.000 | 1.980    | 0.688 | 0.500 | 0.495 | 1.000      | 0.372 | -0.010 |
|                   | MCW0078 | 9  | 2.000 | 2.000 | 1.246    | 0.349 | 0.222 | 0.198 | 1.000      | 0.178 | -0.125 |
|                   | MCW0081 | 10 | 3.000 | 3.000 | 2.469    | 0.997 | 0.800 | 0.595 | 0.136      | 0.528 | -0.345 |
|                   | LEI0192 | 10 | 6.000 | 5.995 | 5.556    | 1.752 | 1.000 | 0.820 | 0.067      | 0.795 | -0.220 |
|                   | MCW0014 | 10 | 4.000 | 3.900 | 2.857    | 1.161 | 1.000 | 0.650 | 0.071      | 0.584 | -0.538 |
|                   | MCW0183 | 10 | 2.000 | 1.900 | 1.105    | 0.199 | 0.100 | 0.095 | 0.200      | 0.090 | -0.053 |
|                   | MCW0067 | 10 | 3.000 | 3.000 | 2.273    | 0.950 | 0.700 | 0.560 | 0.500      | 0.499 | -0.250 |
|                   | ADL0112 | 10 | 4.000 | 3.800 | 2.439    | 1.018 | 1.000 | 0.590 | 0.667      | 0.504 | -0.695 |
|                   | MCW0216 | 10 | 4.000 | 3.989 | 2.778    | 1.168 | 0.300 | 0.640 | 0.286      | 0.581 | 0.531  |
|                   | MCW0104 | 9  | 6.000 | 6.000 | 2.793    | 1.351 | 0.333 | 0.642 | 0.273      | 0.610 | 0.481  |
|                   | MCW0123 | 10 | 4.000 | 3.995 | 2.899    | 1.208 | 1.000 | 0.655 | 0.333      | 0.603 | -0.527 |
|                   | MCW0330 | 10 | 2.000 | 2.000 | 1.471    | 0.500 | 0.400 | 0.320 | 0.250      | 0.269 | -0.250 |
|                   | MCW0165 | 10 | 4.000 | 3.800 | 2.439    | 1.018 | 1.000 | 0.590 | 0.667      | 0.504 | -0.695 |
|                   | MCW0069 | 10 | 3.000 | 2.995 | 2.410    | 0.949 | 0.600 | 0.585 | 0.125      | 0.495 | -0.026 |
|                   | ADL0278 | 10 | 5.000 | 4.989 | 3.846    | 1.471 | 0.900 | 0.740 | 0.119      | 0.701 | -0.216 |
|                   | Mean    | 10 | 3.679 | 3.619 | 2.562    | 1.002 | 0.663 | 0.553 | 0.400      | 0.497 | -0.181 |

| Populations        | Locus   | N  | $N_a$  | $AR$   | $N_{ea}$ | $I$   | $H_o$ | $H_e$ | $M\ ratio$ | $PIC$ | $F$    |
|--------------------|---------|----|--------|--------|----------|-------|-------|-------|------------|-------|--------|
|                    | SE      | 0  | 0.225  | 1.167  | 0.179    | 0.070 | 0.059 | 0.034 | 0.277      | 0.173 | 0.064  |
| MLRBC <sup>2</sup> | MCW0111 | 30 | 6.000  | 5.800  | 2.528    | 1.193 | 0.667 | 0.604 | 0.300      | 0.555 | -0.103 |
|                    | MCW0247 | 30 | 4.000  | 4.000  | 3.103    | 1.233 | 1.000 | 0.678 | 0.667      | 0.618 | -0.475 |
|                    | LEI0234 | 29 | 10.000 | 9.855  | 5.644    | 1.938 | 0.931 | 0.823 | 0.064      | 0.801 | -0.132 |
|                    | LEI0166 | 30 | 3.000  | 3.000  | 2.182    | 0.888 | 0.433 | 0.542 | 0.214      | 0.460 | 0.200  |
|                    | MCW0222 | 30 | 3.000  | 2.992  | 1.312    | 0.468 | 0.233 | 0.238 | 0.500      | 0.221 | 0.019  |
|                    | MCW0037 | 30 | 4.000  | 3.992  | 2.203    | 0.988 | 0.300 | 0.546 | 0.667      | 0.489 | 0.451  |
|                    | ADL0268 | 30 | 4.000  | 3.992  | 2.871    | 1.150 | 0.533 | 0.652 | 0.667      | 0.585 | 0.182  |
|                    | MCW0034 | 27 | 7.000  | 7.000  | 4.326    | 1.610 | 0.185 | 0.769 | 0.318      | 0.732 | 0.759  |
|                    | MCW0206 | 29 | 5.000  | 5.000  | 3.198    | 1.335 | 1.000 | 0.687 | 0.227      | 0.636 | -0.455 |
|                    | MCW0016 | 30 | 5.000  | 4.900  | 3.051    | 1.286 | 1.000 | 0.672 | 0.357      | 0.624 | -0.488 |
|                    | MCW0103 | 30 | 5.000  | 4.899  | 2.990    | 1.242 | 0.967 | 0.666 | 0.500      | 0.609 | -0.452 |
|                    | MCW0295 | 30 | 4.000  | 3.900  | 3.087    | 1.163 | 0.667 | 0.676 | 0.400      | 0.607 | 0.014  |
|                    | LEI0094 | 30 | 6.000  | 5.982  | 2.439    | 1.187 | 0.400 | 0.590 | 0.176      | 0.542 | 0.322  |
|                    | MCW0098 | 30 | 2.000  | 2.000  | 1.260    | 0.360 | 0.233 | 0.206 | 1.000      | 0.185 | -0.132 |
|                    | MCW0078 | 30 | 2.000  | 1.992  | 1.069    | 0.146 | 0.067 | 0.064 | 1.000      | 0.062 | -0.034 |
|                    | MCW0081 | 30 | 5.000  | 4.899  | 2.281    | 1.058 | 0.667 | 0.562 | 0.227      | 0.504 | -0.187 |
|                    | LEI0192 | 28 | 10.000 | 9.892  | 4.296    | 1.782 | 1.000 | 0.767 | 0.064      | 0.740 | -0.303 |
|                    | MCW0014 | 30 | 8.000  | 7.800  | 5.172    | 1.780 | 1.000 | 0.807 | 0.143      | 0.779 | -0.240 |
|                    | MCW0183 | 30 | 4.000  | 4.000  | 1.915    | 0.929 | 0.500 | 0.478 | 0.333      | 0.446 | -0.047 |
|                    | MCW0067 | 30 | 4.000  | 4.000  | 3.209    | 1.243 | 0.867 | 0.688 | 0.667      | 0.629 | -0.259 |
|                    | ADL0112 | 30 | 7.000  | 6.891  | 3.358    | 1.496 | 1.000 | 0.702 | 0.438      | 0.670 | -0.424 |
|                    | MCW0216 | 30 | 5.000  | 4.900  | 1.933    | 0.986 | 0.067 | 0.483 | 0.250      | 0.456 | 0.862  |
|                    | MCW0104 | 27 | 14.000 | 14.000 | 6.312    | 2.176 | 0.630 | 0.842 | 0.241      | 0.825 | 0.252  |
|                    | MCW0123 | 27 | 6.000  | 6.000  | 2.311    | 1.065 | 0.852 | 0.567 | 0.429      | 0.498 | -0.502 |
|                    | MCW0330 | 27 | 2.000  | 2.000  | 1.839    | 0.649 | 0.407 | 0.456 | 0.250      | 0.352 | 0.107  |
|                    | MCW0165 | 30 | 6.000  | 5.900  | 3.309    | 1.434 | 1.000 | 0.698 | 0.375      | 0.662 | -0.433 |
|                    | MCW0069 | 27 | 6.000  | 6.000  | 2.982    | 1.284 | 0.741 | 0.665 | 0.300      | 0.612 | -0.115 |
|                    | ADL0278 | 27 | 6.000  | 6.000  | 2.549    | 1.230 | 0.667 | 0.608 | 0.143      | 0.565 | -0.097 |
|                    | Mean    | 29 | 5.464  | 5.414  | 2.955    | 1.189 | 0.643 | 0.598 | 0.390      | 0.552 | -0.061 |
|                    | SE      | 0  | 0.500  | 2.624  | 0.238    | 0.085 | 0.060 | 0.035 | 0.246      | 0.180 | 0.068  |
| CLRBC <sup>3</sup> | MCW0111 | 10 | 2.000  | 1.976  | 1.724    | 0.611 | 0.000 | 0.420 | 3.500      | 0.332 | 1.000  |

| Populations | Locus   | N  | $N_a$ | $AR$  | $N_{ea}$ | $I$   | $H_o$ | $H_e$ | $M\ ratio$ | $PIC$ | $F$    |
|-------------|---------|----|-------|-------|----------|-------|-------|-------|------------|-------|--------|
|             | MCW0247 | 10 | 3.000 | 2.376 | 1.942    | 0.791 | 0.700 | 0.485 | 0.500      | 0.406 | -0.443 |
|             | LEI0234 | 10 | 6.000 | 4.563 | 4.545    | 1.643 | 0.600 | 0.780 | 0.140      | 0.748 | 0.231  |
|             | LEI0166 | 9  | 2.000 | 1.996 | 1.906    | 0.668 | 0.778 | 0.475 | 0.500      | 0.362 | -0.636 |
|             | MCW0222 | 10 | 2.000 | 1.653 | 1.220    | 0.325 | 0.200 | 0.180 | 0.500      | 0.164 | -0.111 |
|             | MCW0037 | 10 | 3.000 | 2.874 | 2.632    | 1.030 | 0.400 | 0.620 | 2.500      | 0.548 | 0.355  |
|             | ADL0268 | 10 | 3.000 | 2.935 | 2.899    | 1.081 | 0.500 | 0.655 | 1.250      | 0.580 | 0.237  |
|             | MCW0034 | 10 | 4.000 | 3.105 | 2.353    | 1.063 | 0.400 | 0.575 | 0.667      | 0.526 | 0.304  |
|             | MCW0206 | 10 | 2.000 | 1.990 | 1.835    | 0.647 | 0.700 | 0.455 | 0.250      | 0.351 | -0.538 |
|             | MCW0016 | 10 | 3.000 | 2.890 | 2.778    | 1.055 | 1.000 | 0.640 | 2.000      | 0.563 | -0.563 |
|             | MCW0103 | 10 | 2.000 | 1.949 | 1.600    | 0.562 | 0.100 | 0.375 | 2.000      | 0.305 | 0.733  |
|             | MCW0295 | 10 | 4.000 | 3.328 | 3.226    | 1.231 | 1.000 | 0.690 | 0.667      | 0.628 | -0.449 |
|             | LEI0094 | 9  | 5.000 | 3.826 | 3.306    | 1.365 | 0.556 | 0.698 | 0.094      | 0.651 | 0.204  |
|             | MCW0098 | 10 | 3.000 | 2.648 | 2.381    | 0.943 | 1.000 | 0.580 | 0.750      | 0.492 | -0.724 |
|             | MCW0078 | 10 | 3.000 | 2.648 | 2.381    | 0.943 | 1.000 | 0.580 | 0.750      | 0.492 | -0.724 |
|             | MCW0081 | 10 | 2.000 | 1.976 | 1.724    | 0.611 | 0.200 | 0.420 | 0.091      | 0.332 | 0.524  |
|             | LEI0192 | 10 | 4.000 | 3.273 | 2.985    | 1.192 | 0.800 | 0.665 | 0.100      | 0.603 | -0.203 |
|             | MCW0014 | 10 | 3.000 | 2.890 | 2.778    | 1.055 | 0.000 | 0.640 | 0.286      | 0.563 | 1.000  |
|             | MCW0183 | 10 | 4.000 | 3.203 | 2.381    | 1.089 | 0.800 | 0.580 | 0.333      | 0.535 | -0.379 |
|             | MCW0067 | 10 | 3.000 | 2.890 | 2.778    | 1.055 | 1.000 | 0.640 | 0.600      | 0.563 | -0.563 |
|             | ADL0112 | 9  | 3.000 | 2.559 | 1.780    | 0.778 | 0.556 | 0.438 | 0.500      | 0.396 | -0.268 |
|             | MCW0216 | 10 | 1.000 | 1.000 | 1.000    | 0.000 | 0.400 | 0.000 | #DIV/0!    | 0.000 | #N/A   |
|             | MCW0104 | 4  | 3.000 | 3.000 | 2.667    | 1.040 | 1.000 | 0.625 | 0.136      | 0.555 | -0.600 |
|             | MCW0123 | 10 | 5.000 | 4.283 | 4.444    | 1.544 | 1.000 | 0.775 | 0.313      | 0.739 | -0.290 |
|             | MCW0330 | 10 | 2.000 | 1.999 | 2.000    | 0.693 | 0.600 | 0.500 | 0.250      | 0.375 | -0.200 |
|             | MCW0165 | 10 | 2.000 | 1.976 | 1.724    | 0.611 | 0.600 | 0.420 | 1.000      | 0.332 | -0.429 |
|             | MCW0069 | 10 | 3.000 | 2.396 | 2.151    | 0.845 | 0.900 | 0.535 | 0.088      | 0.436 | -0.682 |
|             | ADL0278 | 10 | 4.000 | 3.203 | 2.381    | 0.611 | 0.600 | 0.580 | 0.333      | 0.535 | -0.034 |
|             | Mean    | 10 | 3.071 | 2.693 | 2.411    | 0.913 | 0.621 | 0.537 | 0.744      | 0.468 | -0.120 |
|             | SE      | 0  | 0.212 | 0.788 | 0.155    | 0.066 | 0.060 | 0.032 | 0.834      | 0.165 | 0.098  |

<sup>1</sup>MHSF = Mae Hong Son chickens derived from farmer community, Mae Hong Son.

<sup>2</sup>MLRBC = Mae Hong Son Livestock Research and Breeding Center, Mae Hong Son.

<sup>3</sup>CLRBC = Chiang Mai Livestock Research and Breeding Center, Chiang Mai.

**Table S9.** Comparison of genetic diversity parameters amongst Mae Hong Son chickens (*Gallus gallus*, Linnaeus, 1758) [43] populations, based on 28 microsatellite loci.

| Observed                 | Population 1       | Population 2       | df     | SE    | t-test | p-value  |
|--------------------------|--------------------|--------------------|--------|-------|--------|----------|
| heterozygosity ( $H_o$ ) | MHSF <sup>1</sup>  | MLRBC <sup>2</sup> | 0.020  | 0.022 | 0.924  | 0.369    |
|                          | MHSF <sup>1</sup>  | CLRBC <sup>3</sup> | 0.042  | 0.027 | 1.578  | 0.132    |
|                          | MLRBC <sup>2</sup> | CLRBC <sup>3</sup> | 0.022  | 0.022 | 1.004  | 0.331    |
| heterozygosity ( $H_e$ ) | MHSF <sup>1</sup>  | MLRBC <sup>2</sup> | -0.045 | 0.012 | -3.598 | $p<0.01$ |
|                          | MHSF <sup>1</sup>  | CLRBC <sup>3</sup> | 0.016  | 0.015 | 1.084  | 0.292    |
|                          | MLRBC <sup>2</sup> | CLRBC <sup>3</sup> | 0.061  | 0.012 | 5.096  | $p<0.01$ |

<sup>1</sup>MHSF = Mae Hong Son chickens derived from farmer community, Mae Hong Son.

<sup>2</sup>MLRBC = Mae Hong Son Livestock Research and Breeding Center, Mae Hong Son.

<sup>3</sup>CLRBC = Chiang Mai Livestock Research and Breeding Center, Chiang Mai.

**Table S10.** Inbreeding coefficients ( $F_{IS}$ ), relatedness ( $r$ ), effective population size ( $N_e$ ), and ratio of effective population size to census population ( $N_e/N$ ) of Mae Hong Son chickens (*Gallus gallus*, Linnaeus, 1758) [43] derived from the Mae Hong Son farmer community, Mae Hong Son, Thailand (MHSF), Mae Hong Son Livestock Research and Breeding Center, Mae Hong Son, Thailand (MLRBC), and Chiang Mai Livestock Research and Breeding Center, Chiang Mai, Thailand (CLRBC). Estimates were calculated using NeEstimator version 2.1 [44], COANCESTRY version 1.0.1.9 [34], and GenAlEx version 6.5 [32]. Detailed information on each Mae Hong Son chicken is presented in Table S1.

| Population         | N <sup>1</sup> | $F_{IS}$ <sup>2</sup> | Relatedness ( $r$ ) | Estimated $N_e$ <sup>3</sup> | 95% CIs <sup>4</sup> for $N_e$ | $N_e/N$ |
|--------------------|----------------|-----------------------|---------------------|------------------------------|--------------------------------|---------|
| MHSF <sup>4</sup>  | 10             | -0.113±0.037          | -0.048±0.066        | 15.6                         | 9.6                            | 1.56    |
| MLRBC <sup>5</sup> | 30             | -0.107±0.031          | -0.018±0.040        | 186.8                        | 90.0–110.6                     | 6.22    |
| CLRBC <sup>6</sup> | 10             | -0.045± 0.039         | -0.052±0.150        | 1.9                          | 1.5                            | 0.19    |

<sup>1</sup>Sample size (N); <sup>2</sup>Inbreeding coefficient ( $F_{IS}$ ); <sup>3</sup>Effective population size ( $N_e$ ); <sup>4</sup>Confidence interval (CI).

<sup>4</sup>MHSF = Mae Hong Son chickens derived from farmer community, Mae Hong Son.

<sup>5</sup>MLRBC = Mae Hong Son Livestock Research and Breeding Center, Mae Hong Son.

<sup>6</sup>CLRBC = Chiang Mai Livestock Research and Breeding Center, Chiang Mai.

**Table S11.** Pairwise genetic relatedness ( $r$ ) amongst Mae Hong Son chickens (*Gallus gallus*, Linnaeus, 1758) [43] populations derived from Mae Hong Son farmer community, Mae Hong Son, Thailand (MHSF). Detailed information on each individual chicken is presented in Table S1.

| Sample 1 | Sample 2  | $r$    |
|----------|-----------|--------|
| MHS M1F  | MHS M2F   | 0.225  |
| MHS M1F  | MHS FM3F  | -0.122 |
| MHS M2F  | MHS FM3F  | -0.146 |
| MHS M1F  | MHS M4F   | -0.047 |
| MHS M2F  | MHS M4F   | -0.029 |
| MHS FM3F | MHS M4F   | -0.029 |
| MHS M1F  | MHS FM5F  | 0.007  |
| MHS M2F  | MHS FM5F  | 0.018  |
| MHS FM3F | MHS FM5F  | -0.078 |
| MHS M4F  | MHS FM5F  | -0.012 |
| MHS M1F  | MHS M6F   | -0.028 |
| MHS M2F  | MHS M6F   | -0.025 |
| MHS FM3F | MHS M6F   | -0.015 |
| MHS M4F  | MHS M6F   | -0.007 |
| MHS FM5F | MHS M6F   | -0.086 |
| MHS M1F  | MHS M7F   | -0.063 |
| MHS M2F  | MHS M7F   | -0.029 |
| MHS FM3F | MHS M7F   | -0.083 |
| MHS M4F  | MHS M7F   | 0.016  |
| MHS FM5F | MHS M7F   | -0.011 |
| MHS M6F  | MHS M7F   | 0.018  |
| MHS M1F  | MHS FM8F  | -0.108 |
| MHS M2F  | MHS FM8F  | -0.137 |
| MHS FM3F | MHS FM8F  | -0.065 |
| MHS M4F  | MHS FM8F  | -0.106 |
| MHS FM5F | MHS FM8F  | -0.131 |
| MHS M6F  | MHS FM8F  | -0.042 |
| MHS M7F  | MHS FM8F  | -0.109 |
| MHS M1F  | MHS FM9F  | -0.072 |
| MHS M2F  | MHS FM9F  | -0.102 |
| MHS FM3F | MHS FM9F  | 0.015  |
| MHS M4F  | MHS FM9F  | -0.019 |
| MHS FM5F | MHS FM9F  | -0.067 |
| MHS M6F  | MHS FM9F  | 0.047  |
| MHS M7F  | MHS FM9F  | 0.016  |
| MHS FM8F | MHS FM9F  | -0.047 |
| MHS M1F  | MHS FM10F | -0.127 |
| MHS M2F  | MHS FM10F | -0.111 |
| MHS FM3F | MHS FM10F | -0.100 |
| MHS M4F  | MHS FM10F | -0.071 |
| MHS FM5F | MHS FM10F | -0.009 |
| MHS M6F  | MHS FM10F | -0.107 |



| <b>Sample 1</b> | <b>Sample 2</b> | <b><i>r</i></b> |
|-----------------|-----------------|-----------------|
| MHS M7F         | MHS FM10F       | -0.091          |
| MHS FM8F        | MHS FM10F       | 0.002           |
| MHS FM9F        | MHS FM10F       | -0.110          |

**Table S12.** Pairwise genetic relatedness ( $r$ ) amongst Mae Hong Son chickens (*Gallus gallus*, Linnaeus, 1758) [43] populations from Mae Hong Son Livestock Research and Breeding Center, Mae Hong Son, Thailand (MLRBC). Detailed information on each individual chicken is presented in Table S1.

| Sample 1 | Sample 2 | $r$    |
|----------|----------|--------|
| MHS M1   | MHS M2   | -0.002 |
| MHS M1   | MHS M3   | -0.056 |
| MHS M2   | MHS M3   | 0.020  |
| MHS M1   | MHS M4   | -0.002 |
| MHS M2   | MHS M4   | 0.108  |
| MHS M3   | MHS M4   | 0.031  |
| MHS M1   | MHS M5   | 0.051  |
| MHS M2   | MHS M5   | -0.037 |
| MHS M3   | MHS M5   | -0.102 |
| MHS M4   | MHS M5   | -0.049 |
| MHS M1   | MHS M6   | -0.075 |
| MHS M2   | MHS M6   | -0.064 |
| MHS M3   | MHS M6   | 0.023  |
| MHS M4   | MHS M6   | 0.039  |
| MHS M5   | MHS M6   | -0.032 |
| MHS M1   | MHS M7   | -0.031 |
| MHS M2   | MHS M7   | -0.030 |
| MHS M3   | MHS M7   | 0.005  |
| MHS M4   | MHS M7   | -0.029 |
| MHS M5   | MHS M7   | -0.078 |
| MHS M6   | MHS M7   | -0.065 |
| MHS M1   | MHS M8   | -0.008 |
| MHS M2   | MHS M8   | 0.051  |
| MHS M3   | MHS M8   | 0.022  |
| MHS M4   | MHS M8   | -0.049 |
| MHS M5   | MHS M8   | -0.015 |
| MHS M6   | MHS M8   | -0.039 |
| MHS M7   | MHS M8   | -0.019 |
| MHS M1   | MHS M9   | -0.038 |
| MHS M2   | MHS M9   | 0.013  |
| MHS M3   | MHS M9   | -0.080 |
| MHS M4   | MHS M9   | -0.004 |
| MHS M5   | MHS M9   | 0.062  |
| MHS M6   | MHS M9   | -0.063 |
| MHS M7   | MHS M9   | -0.061 |
| MHS M8   | MHS M9   | -0.006 |
| MHS M1   | MHS M10  | -0.084 |
| MHS M2   | MHS M10  | -0.004 |
| MHS M3   | MHS M10  | -0.055 |
| MHS M4   | MHS M10  | -0.067 |
| MHS M5   | MHS M10  | -0.054 |
| MHS M6   | MHS M10  | -0.025 |

| <b>Sample 1</b> | <b>Sample 2</b> | <b><i>r</i></b> |
|-----------------|-----------------|-----------------|
| MHS M7          | MHS M10         | -0.059          |
| MHS M8          | MHS M10         | 0.056           |
| MHS M9          | MHS M10         | -0.027          |
| MHS M1          | MHS M11         | 0.027           |
| MHS M2          | MHS M11         | 0.002           |
| MHS M3          | MHS M11         | 0.014           |
| MHS M4          | MHS M11         | 0.047           |
| MHS M5          | MHS M11         | -0.042          |
| MHS M6          | MHS M11         | -0.033          |
| MHS M7          | MHS M11         | -0.008          |
| MHS M8          | MHS M11         | -0.032          |
| MHS M9          | MHS M11         | 0.009           |
| MHS M10         | MHS M11         | -0.040          |
| MHS M1          | MHS M12         | -0.063          |
| MHS M2          | MHS M12         | 0.017           |
| MHS M3          | MHS M12         | -0.006          |
| MHS M4          | MHS M12         | -0.039          |
| MHS M5          | MHS M12         | -0.072          |
| MHS M6          | MHS M12         | -0.047          |
| MHS M7          | MHS M12         | -0.046          |
| MHS M8          | MHS M12         | -0.016          |
| MHS M9          | MHS M12         | 0.061           |
| MHS M10         | MHS M12         | -0.051          |
| MHS M11         | MHS M12         | 0.049           |
| MHS M1          | MHS M13         | -0.037          |
| MHS M2          | MHS M13         | -0.062          |
| MHS M3          | MHS M13         | -0.053          |
| MHS M4          | MHS M13         | -0.046          |
| MHS M5          | MHS M13         | -0.026          |
| MHS M6          | MHS M13         | -0.033          |
| MHS M7          | MHS M13         | 0.022           |
| MHS M8          | MHS M13         | -0.045          |
| MHS M9          | MHS M13         | -0.004          |
| MHS M10         | MHS M13         | 0.025           |
| MHS M11         | MHS M13         | -0.070          |
| MHS M12         | MHS M13         | -0.028          |
| MHS M1          | MHS M14         | -0.046          |
| MHS M2          | MHS M14         | -0.015          |
| MHS M3          | MHS M14         | -0.036          |
| MHS M4          | MHS M14         | -0.045          |
| MHS M5          | MHS M14         | -0.045          |
| MHS M6          | MHS M14         | -0.052          |
| MHS M7          | MHS M14         | -0.042          |
| MHS M8          | MHS M14         | -0.034          |
| MHS M9          | MHS M14         | -0.016          |
| MHS M10         | MHS M14         | -0.057          |
| MHS M11         | MHS M14         | 0.001           |

| <b>Sample 1</b> | <b>Sample 2</b> | <b><i>r</i></b> |
|-----------------|-----------------|-----------------|
| MHS M12         | MHS M14         | 0.019           |
| MHS M13         | MHS M14         | -0.002          |
| MHS M1          | MHS M15         | 0.025           |
| MHS M2          | MHS M15         | -0.030          |
| MHS M3          | MHS M15         | -0.060          |
| MHS M4          | MHS M15         | -0.013          |
| MHS M5          | MHS M15         | 0.015           |
| MHS M6          | MHS M15         | 0.016           |
| MHS M7          | MHS M15         | -0.034          |
| MHS M8          | MHS M15         | -0.113          |
| MHS M9          | MHS M15         | -0.055          |
| MHS M10         | MHS M15         | -0.045          |
| MHS M11         | MHS M15         | -0.018          |
| MHS M12         | MHS M15         | -0.076          |
| MHS M13         | MHS M15         | -0.006          |
| MHS M14         | MHS M15         | -0.027          |
| MHS M1          | MHS FM1         | -0.044          |
| MHS M2          | MHS FM1         | -0.067          |
| MHS M3          | MHS FM1         | 0.027           |
| MHS M4          | MHS FM1         | -0.060          |
| MHS M5          | MHS FM1         | -0.013          |
| MHS M6          | MHS FM1         | -0.009          |
| MHS M7          | MHS FM1         | 0.065           |
| MHS M8          | MHS FM1         | -0.079          |
| MHS M9          | MHS FM1         | -0.039          |
| MHS M10         | MHS FM1         | 0.016           |
| MHS M11         | MHS FM1         | -0.062          |
| MHS M12         | MHS FM1         | -0.075          |
| MHS M13         | MHS FM1         | 0.058           |
| MHS M14         | MHS FM1         | 0.022           |
| MHS M15         | MHS FM1         | 0.060           |
| MHS M1          | MHS FM2         | -0.022          |
| MHS M2          | MHS FM2         | 0.016           |
| MHS M3          | MHS FM2         | -0.023          |
| MHS M4          | MHS FM2         | 0.008           |
| MHS M5          | MHS FM2         | -0.011          |
| MHS M6          | MHS FM2         | -0.002          |
| MHS M7          | MHS FM2         | 0.004           |
| MHS M8          | MHS FM2         | -0.061          |
| MHS M9          | MHS FM2         | 0.013           |
| MHS M10         | MHS FM2         | -0.058          |
| MHS M11         | MHS FM2         | -0.047          |
| MHS M12         | MHS FM2         | -0.013          |
| MHS M13         | MHS FM2         | -0.039          |
| MHS M14         | MHS FM2         | -0.002          |
| MHS M15         | MHS FM2         | -0.024          |

| <b>Sample 1</b> | <b>Sample 2</b> | <b><i>r</i></b> |
|-----------------|-----------------|-----------------|
| MHS FM1         | MHS FM2         | -0.084          |
| MHS M1          | MHS FM3         | -0.040          |
| MHS M2          | MHS FM3         | 0.012           |
| MHS M3          | MHS FM3         | -0.011          |
| MHS M4          | MHS FM3         | -0.008          |
| MHS M5          | MHS FM3         | -0.046          |
| MHS M6          | MHS FM3         | -0.103          |
| MHS M7          | MHS FM3         | -0.028          |
| MHS M8          | MHS FM3         | -0.039          |
| MHS M9          | MHS FM3         | -0.036          |
| MHS M10         | MHS FM3         | -0.066          |
| MHS M11         | MHS FM3         | 0.013           |
| MHS M12         | MHS FM3         | 0.004           |
| MHS M13         | MHS FM3         | -0.016          |
| MHS M14         | MHS FM3         | 0.027           |
| MHS M15         | MHS FM3         | -0.083          |
| MHS FM1         | MHS FM3         | -0.002          |
| MHS FM2         | MHS FM3         | -0.001          |
| MHS M1          | MHS FM4         | 0.052           |
| MHS M2          | MHS FM4         | -0.021          |
| MHS M3          | MHS FM4         | -0.010          |
| MHS M4          | MHS FM4         | 0.059           |
| MHS M5          | MHS FM4         | 0.015           |
| MHS M6          | MHS FM4         | -0.046          |
| MHS M7          | MHS FM4         | 0.036           |
| MHS M8          | MHS FM4         | 0.034           |
| MHS M9          | MHS FM4         | 0.031           |
| MHS M10         | MHS FM4         | -0.007          |
| MHS M11         | MHS FM4         | 0.093           |
| MHS M12         | MHS FM4         | -0.070          |
| MHS M13         | MHS FM4         | -0.052          |
| MHS M14         | MHS FM4         | -0.043          |
| MHS M15         | MHS FM4         | -0.058          |
| MHS FM1         | MHS FM4         | -0.100          |
| MHS FM2         | MHS FM4         | -0.011          |
| MHS FM3         | MHS FM4         | -0.064          |
| MHS M1          | MHS FM5         | -0.012          |
| MHS M2          | MHS FM5         | -0.008          |
| MHS M3          | MHS FM5         | -0.040          |
| MHS M4          | MHS FM5         | -0.084          |
| MHS M5          | MHS FM5         | 0.007           |
| MHS M6          | MHS FM5         | 0.073           |
| MHS M7          | MHS FM5         | -0.097          |
| MHS M8          | MHS FM5         | -0.029          |
| MHS M9          | MHS FM5         | -0.018          |
| MHS M10         | MHS FM5         | -0.017          |
| MHS M11         | MHS FM5         | -0.059          |

| Sample 1 | Sample 2 | <i>r</i> |
|----------|----------|----------|
| MHS M12  | MHS FM5  | -0.053   |
| MHS M13  | MHS FM5  | -0.042   |
| MHS M14  | MHS FM5  | 0.014    |
| MHS M15  | MHS FM5  | -0.052   |
| MHS FM1  | MHS FM5  | -0.057   |
| MHS FM2  | MHS FM5  | -0.001   |
| MHS FM3  | MHS FM5  | -0.032   |
| MHS FM4  | MHS FM5  | -0.006   |
| MHS M1   | MHS FM6  | -0.067   |
| MHS M2   | MHS FM6  | -0.118   |
| MHS M3   | MHS FM6  | -0.013   |
| MHS M4   | MHS FM6  | -0.087   |
| MHS M5   | MHS FM6  | -0.003   |
| MHS M6   | MHS FM6  | -0.045   |
| MHS M7   | MHS FM6  | -0.040   |
| MHS M8   | MHS FM6  | -0.005   |
| MHS M9   | MHS FM6  | -0.031   |
| MHS M10  | MHS FM6  | 0.011    |
| MHS M11  | MHS FM6  | -0.020   |
| MHS M12  | MHS FM6  | -0.033   |
| MHS M13  | MHS FM6  | -0.030   |
| MHS M14  | MHS FM6  | 0.007    |
| MHS M15  | MHS FM6  | 0.003    |
| MHS FM1  | MHS FM6  | -0.029   |
| MHS FM2  | MHS FM6  | 0.041    |
| MHS FM3  | MHS FM6  | -0.052   |
| MHS FM4  | MHS FM6  | -0.055   |
| MHS FM5  | MHS FM6  | -0.040   |
| MHS M1   | MHS FM7  | -0.066   |
| MHS M2   | MHS FM7  | -0.043   |
| MHS M3   | MHS FM7  | 0.046    |
| MHS M4   | MHS FM7  | 0.056    |
| MHS M5   | MHS FM7  | -0.004   |
| MHS M6   | MHS FM7  | 0.013    |
| MHS M7   | MHS FM7  | -0.071   |
| MHS M8   | MHS FM7  | -0.054   |
| MHS M9   | MHS FM7  | 0.009    |
| MHS M10  | MHS FM7  | -0.018   |
| MHS M11  | MHS FM7  | -0.079   |
| MHS M12  | MHS FM7  | -0.040   |
| MHS M13  | MHS FM7  | -0.065   |
| MHS M14  | MHS FM7  | -0.047   |
| MHS M15  | MHS FM7  | 0.016    |
| MHS FM1  | MHS FM7  | -0.058   |
| MHS FM2  | MHS FM7  | 0.100    |
| MHS FM3  | MHS FM7  | -0.025   |

| <b>Sample 1</b> | <b>Sample 2</b> | <b><i>r</i></b> |
|-----------------|-----------------|-----------------|
| MHS FM4         | MHS FM7         | 0.066           |
| MHS FM5         | MHS FM7         | -0.022          |
| MHS FM6         | MHS FM7         | 0.033           |
| MHS M1          | MHS FM8         | -0.015          |
| MHS M2          | MHS FM8         | 0.012           |
| MHS M3          | MHS FM8         | -0.032          |
| MHS M4          | MHS FM8         | -0.011          |
| MHS M5          | MHS FM8         | 0.045           |
| MHS M6          | MHS FM8         | -0.062          |
| MHS M7          | MHS FM8         | -0.023          |
| MHS M8          | MHS FM8         | -0.006          |
| MHS M9          | MHS FM8         | -0.021          |
| MHS M10         | MHS FM8         | -0.007          |
| MHS M11         | MHS FM8         | -0.087          |
| MHS M12         | MHS FM8         | -0.036          |
| MHS M13         | MHS FM8         | -0.022          |
| MHS M14         | MHS FM8         | -0.003          |
| MHS M15         | MHS FM8         | 0.028           |
| MHS FM1         | MHS FM8         | -0.028          |
| MHS FM2         | MHS FM8         | -0.043          |
| MHS FM3         | MHS FM8         | 0.073           |
| MHS FM4         | MHS FM8         | -0.018          |
| MHS FM5         | MHS FM8         | 0.015           |
| MHS FM6         | MHS FM8         | 0.027           |
| MHS FM7         | MHS FM8         | -0.038          |
| MHS M1          | MHS FM9         | -0.004          |
| MHS M2          | MHS FM9         | -0.026          |
| MHS M3          | MHS FM9         | -0.017          |
| MHS M4          | MHS FM9         | -0.072          |
| MHS M5          | MHS FM9         | 0.022           |
| MHS M6          | MHS FM9         | -0.070          |
| MHS M7          | MHS FM9         | 0.067           |
| MHS M8          | MHS FM9         | 0.002           |
| MHS M9          | MHS FM9         | 0.020           |
| MHS M10         | MHS FM9         | 0.011           |
| MHS M11         | MHS FM9         | -0.059          |
| MHS M12         | MHS FM9         | -0.044          |
| MHS M13         | MHS FM9         | 0.025           |
| MHS M14         | MHS FM9         | 0.020           |
| MHS M15         | MHS FM9         | -0.068          |
| MHS FM1         | MHS FM9         | -0.014          |
| MHS FM2         | MHS FM9         | -0.034          |
| MHS FM3         | MHS FM9         | 0.000           |
| MHS FM4         | MHS FM9         | -0.019          |
| MHS FM5         | MHS FM9         | 0.010           |
| MHS FM6         | MHS FM9         | 0.039           |
| MHS FM7         | MHS FM9         | -0.050          |

| <b>Sample 1</b> | <b>Sample 2</b> | <b><i>r</i></b> |
|-----------------|-----------------|-----------------|
| MHS FM8         | MHS FM9         | 0.015           |
| MHS M1          | MHS FM10        | -0.066          |
| MHS M2          | MHS FM10        | -0.004          |
| MHS M3          | MHS FM10        | -0.063          |
| MHS M4          | MHS FM10        | -0.036          |
| MHS M5          | MHS FM10        | -0.014          |
| MHS M6          | MHS FM10        | 0.007           |
| MHS M7          | MHS FM10        | -0.018          |
| MHS M8          | MHS FM10        | 0.021           |
| MHS M9          | MHS FM10        | 0.012           |
| MHS M10         | MHS FM10        | -0.009          |
| MHS M11         | MHS FM10        | -0.023          |
| MHS M12         | MHS FM10        | 0.000           |
| MHS M13         | MHS FM10        | -0.038          |
| MHS M14         | MHS FM10        | -0.059          |
| MHS M15         | MHS FM10        | -0.039          |
| MHS FM1         | MHS FM10        | -0.050          |
| MHS FM2         | MHS FM10        | -0.044          |
| MHS FM3         | MHS FM10        | -0.036          |
| MHS FM4         | MHS FM10        | -0.022          |
| MHS FM5         | MHS FM10        | 0.013           |
| MHS FM6         | MHS FM10        | -0.025          |
| MHS FM7         | MHS FM10        | -0.026          |
| MHS FM8         | MHS FM10        | -0.035          |
| MHS FM9         | MHS FM10        | -0.006          |
| MHS M1          | MHS FM11        | -0.062          |
| MHS M2          | MHS FM11        | -0.004          |
| MHS M3          | MHS FM11        | -0.065          |
| MHS M4          | MHS FM11        | 0.033           |
| MHS M5          | MHS FM11        | 0.008           |
| MHS M6          | MHS FM11        | -0.018          |
| MHS M7          | MHS FM11        | -0.035          |
| MHS M8          | MHS FM11        | -0.029          |
| MHS M9          | MHS FM11        | 0.017           |
| MHS M10         | MHS FM11        | -0.014          |
| MHS M11         | MHS FM11        | -0.015          |
| MHS M12         | MHS FM11        | 0.015           |
| MHS M13         | MHS FM11        | 0.036           |
| MHS M14         | MHS FM11        | -0.043          |
| MHS M15         | MHS FM11        | -0.034          |
| MHS FM1         | MHS FM11        | -0.026          |
| MHS FM2         | MHS FM11        | -0.022          |
| MHS FM3         | MHS FM11        | -0.051          |
| MHS FM4         | MHS FM11        | 0.016           |
| MHS FM5         | MHS FM11        | -0.046          |
| MHS FM6         | MHS FM11        | -0.008          |



| <b>Sample 1</b> | <b>Sample 2</b> | <b><i>r</i></b> |
|-----------------|-----------------|-----------------|
| MHS FM7         | MHS FM11        | 0.033           |
| MHS FM8         | MHS FM11        | -0.018          |
| MHS FM9         | MHS FM11        | -0.026          |
| MHS FM10        | MHS FM11        | -0.024          |
| MHS M1          | MHS FM12        | 0.010           |
| MHS M2          | MHS FM12        | -0.029          |
| MHS M3          | MHS FM12        | -0.071          |
| MHS M4          | MHS FM12        | -0.028          |
| MHS M5          | MHS FM12        | 0.007           |
| MHS M6          | MHS FM12        | -0.054          |
| MHS M7          | MHS FM12        | 0.057           |
| MHS M8          | MHS FM12        | -0.030          |
| MHS M9          | MHS FM12        | -0.027          |
| MHS M10         | MHS FM12        | -0.069          |
| MHS M11         | MHS FM12        | -0.002          |
| MHS M12         | MHS FM12        | 0.005           |
| MHS M13         | MHS FM12        | -0.026          |
| MHS M14         | MHS FM12        | -0.032          |
| MHS M15         | MHS FM12        | -0.005          |
| MHS FM1         | MHS FM12        | -0.001          |
| MHS FM2         | MHS FM12        | -0.006          |
| MHS FM3         | MHS FM12        | 0.000           |
| MHS FM4         | MHS FM12        | -0.022          |
| MHS FM5         | MHS FM12        | -0.084          |
| MHS FM6         | MHS FM12        | -0.009          |
| MHS FM7         | MHS FM12        | -0.079          |
| MHS FM8         | MHS FM12        | 0.018           |
| MHS FM9         | MHS FM12        | -0.048          |
| MHS FM10        | MHS FM12        | 0.076           |
| MHS FM11        | MHS FM12        | 0.039           |
| MHS M1          | MHS FM13        | -0.009          |
| MHS M2          | MHS FM13        | -0.040          |
| MHS M3          | MHS FM13        | -0.015          |
| MHS M4          | MHS FM13        | -0.051          |
| MHS M5          | MHS FM13        | -0.072          |
| MHS M6          | MHS FM13        | -0.017          |
| MHS M7          | MHS FM13        | -0.027          |
| MHS M8          | MHS FM13        | -0.063          |
| MHS M9          | MHS FM13        | -0.042          |
| MHS M10         | MHS FM13        | -0.067          |
| MHS M11         | MHS FM13        | -0.015          |
| MHS M12         | MHS FM13        | 0.045           |
| MHS M13         | MHS FM13        | 0.196           |
| MHS M14         | MHS FM13        | 0.034           |
| MHS M15         | MHS FM13        | -0.004          |
| MHS FM1         | MHS FM13        | -0.011          |
| MHS FM2         | MHS FM13        | 0.026           |

| Sample 1 | Sample 2 | <i>r</i> |
|----------|----------|----------|
| MHS FM3  | MHS FM13 | 0.036    |
| MHS FM4  | MHS FM13 | -0.060   |
| MHS FM5  | MHS FM13 | -0.008   |
| MHS FM6  | MHS FM13 | -0.035   |
| MHS FM7  | MHS FM13 | -0.075   |
| MHS FM8  | MHS FM13 | -0.066   |
| MHS FM9  | MHS FM13 | 0.035    |
| MHS FM10 | MHS FM13 | -0.027   |
| MHS FM11 | MHS FM13 | 0.016    |
| MHS FM12 | MHS FM13 | -0.028   |
| MHS M1   | MHS FM14 | 0.030    |
| MHS M2   | MHS FM14 | 0.028    |
| MHS M3   | MHS FM14 | -0.043   |
| MHS M4   | MHS FM14 | -0.056   |
| MHS M5   | MHS FM14 | -0.056   |
| MHS M6   | MHS FM14 | -0.086   |
| MHS M7   | MHS FM14 | -0.050   |
| MHS M8   | MHS FM14 | 0.044    |
| MHS M9   | MHS FM14 | -0.048   |
| MHS M10  | MHS FM14 | -0.012   |
| MHS M11  | MHS FM14 | -0.039   |
| MHS M12  | MHS FM14 | -0.031   |
| MHS M13  | MHS FM14 | -0.047   |
| MHS M14  | MHS FM14 | 0.003    |
| MHS M15  | MHS FM14 | 0.009    |
| MHS FM1  | MHS FM14 | -0.057   |
| MHS FM2  | MHS FM14 | 0.026    |
| MHS FM3  | MHS FM14 | 0.058    |
| MHS FM4  | MHS FM14 | -0.072   |
| MHS FM5  | MHS FM14 | 0.026    |
| MHS FM6  | MHS FM14 | 0.080    |
| MHS FM7  | MHS FM14 | -0.061   |
| MHS FM8  | MHS FM14 | 0.062    |
| MHS FM9  | MHS FM14 | -0.020   |
| MHS FM10 | MHS FM14 | -0.067   |
| MHS FM11 | MHS FM14 | -0.007   |
| MHS FM12 | MHS FM14 | -0.032   |
| MHS FM13 | MHS FM14 | 0.009    |
| MHS M1   | MHS FM15 | 0.021    |
| MHS M2   | MHS FM15 | -0.004   |
| MHS M3   | MHS FM15 | -0.030   |
| MHS M4   | MHS FM15 | -0.014   |
| MHS M5   | MHS FM15 | 0.054    |
| MHS M6   | MHS FM15 | -0.070   |
| MHS M7   | MHS FM15 | -0.058   |
| MHS M8   | MHS FM15 | -0.026   |

| <b>Sample 1</b> | <b>Sample 2</b> | <b><i>r</i></b> |
|-----------------|-----------------|-----------------|
| MHS M9          | MHS FM15        | 0.009           |
| MHS M10         | MHS FM15        | -0.031          |
| MHS M11         | MHS FM15        | -0.049          |
| MHS M12         | MHS FM15        | -0.075          |
| MHS M13         | MHS FM15        | -0.065          |
| MHS M14         | MHS FM15        | 0.006           |
| MHS M15         | MHS FM15        | 0.015           |
| MHS FM1         | MHS FM15        | 0.039           |
| MHS FM2         | MHS FM15        | -0.050          |
| MHS FM3         | MHS FM15        | -0.056          |
| MHS FM4         | MHS FM15        | 0.017           |
| MHS FM5         | MHS FM15        | 0.000           |
| MHS FM6         | MHS FM15        | 0.021           |
| MHS FM7         | MHS FM15        | 0.005           |
| MHS FM8         | MHS FM15        | -0.004          |
| MHS FM9         | MHS FM15        | 0.013           |
| MHS FM10        | MHS FM15        | -0.054          |
| MHS FM11        | MHS FM15        | 0.029           |
| MHS FM12        | MHS FM15        | -0.093          |
| MHS FM13        | MHS FM15        | -0.002          |
| MHS FM14        | MHS FM15        | 0.077           |

**Table S13.** Pairwise genetic relatedness ( $r$ ) amongst Mae Hong Son chickens (*Gallus gallus*, Linnaeus, 1758) [43] populations from Chiang Mai Livestock Research and Breeding Center, Chiang Mai, Thailand (CLRBC). Detailed information on each individual chicken is presented in Table S1.

| Sample 1 | Sample 2 | $r$    |
|----------|----------|--------|
| MHS1     | MHS2     | 0.283  |
| MHS1     | MHS3     | -0.116 |
| MHS2     | MHS3     | -0.142 |
| MHS1     | MHS4     | -0.116 |
| MHS2     | MHS4     | -0.073 |
| MHS3     | MHS4     | -0.081 |
| MHS1     | MHS5     | -0.146 |
| MHS2     | MHS5     | -0.104 |
| MHS3     | MHS5     | -0.103 |
| MHS4     | MHS5     | 0.441  |
| MHS1     | MHS6     | -0.140 |
| MHS2     | MHS6     | -0.148 |
| MHS3     | MHS6     | 0.248  |
| MHS4     | MHS6     | -0.133 |
| MHS5     | MHS6     | -0.077 |
| MHS1     | MHS7     | -0.106 |
| MHS2     | MHS7     | -0.089 |
| MHS3     | MHS7     | -0.036 |
| MHS4     | MHS7     | -0.137 |
| MHS5     | MHS7     | -0.089 |
| MHS6     | MHS7     | 0.047  |
| MHS1     | MHS8     | -0.068 |
| MHS2     | MHS8     | -0.080 |
| MHS3     | MHS8     | 0.012  |
| MHS4     | MHS8     | -0.135 |
| MHS5     | MHS8     | -0.150 |
| MHS6     | MHS8     | 0.059  |
| MHS7     | MHS8     | 0.242  |
| MHS1     | MHS9     | -0.003 |
| MHS2     | MHS9     | -0.003 |
| MHS3     | MHS9     | -0.235 |
| MHS4     | MHS9     | -0.132 |
| MHS5     | MHS9     | -0.168 |
| MHS6     | MHS9     | -0.151 |
| MHS7     | MHS9     | -0.162 |
| MHS8     | MHS9     | -0.119 |
| MHS1     | MHS10    | 0.033  |
| MHS2     | MHS10    | 0.013  |
| MHS3     | MHS10    | -0.199 |
| MHS4     | MHS10    | -0.096 |
| MHS5     | MHS10    | -0.147 |
| MHS6     | MHS10    | -0.140 |

| Sample 1 | Sample 2 | <i>r</i> |
|----------|----------|----------|
| MHS7     | MHS10    | -0.162   |
| MHS8     | MHS10    | -0.142   |
| MHS9     | MHS10    | 0.389    |

**Table S14.** Relatedness (*r*) distributions of Mae Hong Son chickens (*Gallus gallus*, Linnaeus, 1758) [43].

| Population 1       | Population 2       | Relatedness ( <i>r</i> ) |                 |
|--------------------|--------------------|--------------------------|-----------------|
|                    |                    | Density                  | <i>p</i> -value |
| MHSF <sup>1</sup>  | MLRBC <sup>2</sup> | 0.300                    | 0.509           |
| MHSF <sup>1</sup>  | CLRBC <sup>3</sup> | 0.700                    | <0.05           |
| MLRBC <sup>2</sup> | CLRBC <sup>3</sup> | 0.700                    | <0.05           |

<sup>1</sup>MHSF = Mae Hong Son chickens derived from farmer community, Mae Hong Son.

<sup>2</sup>MLRBC = Mae Hong Son Livestock Research and Breeding Center, Mae Hong Son.

<sup>3</sup>CLRBC = Chiang Mai Livestock Research and Breeding Center, Chiang Mai.

**Table S15.** Inbreeding coefficients ( $F_{IS}$ ) of Mae Hong Son chickens (n = 10) (*Gallus gallus*, Linnaeus, 1758) [43] derived from Mae Hong Son farmer community, Mae Hong Son, Thailand (MHSF). Detailed information on each individual chicken is presented in Table S1.

| Individual | $F_{IS}$ |
|------------|----------|
| MHSM1F     | -0.0703  |
| MHSM2F     | -0.0804  |
| MHSFM3F    | -0.0539  |
| MHSM4F     | -0.1352  |
| MHSFM5F    | -0.1672  |
| MHSM6F     | -0.1498  |
| MHSM7F     | -0.1156  |
| MHSFM8F    | -0.1387  |
| MHSFM9F    | -0.0891  |
| MHSFM10F   | -0.1314  |

**Table S16.** Inbreeding coefficients ( $F_{IS}$ ) of Mae Hong Son chickens ( $n = 30$ ) (*Gallus gallus*, Linnaeus, 1758) [43] from Mae Hong Son Livestock Research and Breeding Center, Mae Hong Son, Thailand (MLRBC). Detailed information on each individual chicken is presented in Table S1.

| Individual | $F_{IS}$ |
|------------|----------|
| MHSM1      | -0.0993  |
| MHSM2      | -0.0888  |
| MHSM3      | -0.1259  |
| MHSM4      | -0.143   |
| MHSM5      | -0.0969  |
| MHSM6      | -0.1175  |
| MHSM7      | -0.1518  |
| MHSM8      | -0.0692  |
| MHSM9      | -0.0897  |
| MHSM10     | -0.0803  |
| MHSM11     | -0.0874  |
| MHSM12     | -0.1367  |
| MHSM13     | -0.1451  |
| MHSM14     | -0.0664  |
| MHSM15     | -0.1032  |
| MHSFM1     | -0.1163  |
| MHSFM2     | -0.1221  |
| MHSFM3     | -0.1522  |
| MHSFM4     | -0.1197  |
| MHSFM5     | -0.004   |
| MHSFM6     | -0.0838  |
| MHSFM7     | -0.0972  |
| MHSFM8     | -0.1287  |
| MHSFM9     | -0.1275  |
| MHSFM10    | -0.0894  |
| MHSFM11    | -0.1163  |
| MHSFM12    | -0.0881  |
| MHSFM13    | -0.1457  |
| MHSFM14    | -0.1302  |
| MHSFM15    | -0.1122  |



**Table S17.** Inbreeding coefficients ( $F_{IS}$ ) of Mae Hong Son chickens ( $n = 10$ ) (*Gallus gallus*, Linnaeus, 1758) [43] from Chiang Mai Livestock Research and Breeding Center, Chiang Mai, Thailand (CLRBC). Detailed information on each individual chicken is presented in Table S1.

| Individual | $F_{IS}$ |
|------------|----------|
| MHS1       | -0.0564  |
| MHS2       | -0.0248  |
| MHS3       | -0.008   |
| MHS4       | -0.0294  |
| MHS5       | -0.0667  |
| MHS6       | -0.0097  |
| MHS7       | -0.0489  |
| MHS8       | 0.0068   |
| MHS9       | -0.1115  |
| MHS10      | -0.0968  |

**Table S18.**  $F_{IS}$  distributions for Mae Hong Son chickens (*Gallus gallus*, Linnaeus, 1758) [43].

| Population 1       | Population 2       | Inbreeding coefficient ( $F_{IS}$ ) |            |
|--------------------|--------------------|-------------------------------------|------------|
|                    |                    | Density                             | $p$ -value |
| MHSF <sup>1</sup>  | MLRBC <sup>2</sup> | 0.360                               | <0.01      |
| MHSF <sup>1</sup>  | CLRBC <sup>3</sup> | 0.356                               | <0.01      |
| MLRBC <sup>2</sup> | CLRBC <sup>3</sup> | 0.631                               | <0.01      |

<sup>1</sup>MHSF = Mae Hong Son chickens derived from farmer community, Mae Hong Son.

<sup>2</sup>MLRBC = Mae Hong Son Livestock Research and Breeding Center, Mae Hong Son.

<sup>3</sup>CLRBC = Chiang Mai Livestock Research and Breeding Center, Chiang Mai.

**Table S19.** Pairwise genetic differentiation ( $F_{ST}$ ), pairwise  $F_{ST}^{ENA}$  values with ENA correction for null alleles, and  $R_{ST}$  values using FSTAT version 2.9.3 [29] for Mae Hong Son chickens (*Gallus gallus*, Linnaeus, 1758) [43], subjected to captive breeding, based on 28 microsatellite loci. Numbers indicate  $p$ -values with 110 permutations. Detailed information on each individual chicken is presented in Table S1.

| Population 1       | Population 2       | $F_{ST}$ | $F_{ST}^{ENA}$ | $R_{ST}$ |
|--------------------|--------------------|----------|----------------|----------|
| MHSF <sup>1</sup>  | MLRBC <sup>2</sup> | 0.084*   | 0.084          | 0.074    |
| MHSF <sup>1</sup>  | CLRBC <sup>3</sup> | 0.182*   | 0.195          | 0.377    |
| MLRBC <sup>2</sup> | CLRBC <sup>3</sup> | 0.145*   | 0.148          | 0.379    |

\* $p$  value < 0.05.

<sup>1</sup>MHSF = Mae Hong Son chickens derived from farmer community, Mae Hong Son.

<sup>2</sup>MLRBC = Mae Hong Son Livestock Research and Breeding Center, Mae Hong Son.

<sup>3</sup>CLRBC = Chiang Mai Livestock Research and Breeding Center, Chiang Mai .

**Table S20.** Analysis of molecular variance (AMOVA) for Mae Hong Son chickens (*Gallus gallus*, Linnaeus, 1758) [43], based on 28 microsatellite loci, using Arlequin version 3.5.2.2 [11]. Detailed information on each individual chicken is presented in Table S1.

| Source of variation | df | Sum of squares | Variance components | Percentage of variation |
|---------------------|----|----------------|---------------------|-------------------------|
| Among populations   | 2  | 174.733        | 5.007               | 22%                     |
| Within populations  | 47 | 811.567        | 17.267              | 78%                     |
| Total               | 49 | 986.300        | 22.274              | 100%                    |

**Table S21.** Results of pairwise population Nei's genetic distance ( $D$ ) in Mae Hong Son chickens ( $n = 50$ ) (*Gallus gallus*, Linnaeus, 1758) [43], based on 28 microsatellite loci, using GenAlEx version 6.5 [32].

| <i>Nei D</i>       | MHSF <sup>1</sup> | MLRBC <sup>2</sup> | CLRBC <sup>3</sup> |
|--------------------|-------------------|--------------------|--------------------|
| MHSF <sup>1</sup>  | 0.000             |                    |                    |
| MLRBC <sup>2</sup> | 0.193             | 0.000              |                    |
| CLRBC <sup>3</sup> | 0.502             | 0.375              | 0.000              |

<sup>1</sup>MHSF = Mae Hong Son chickens derived from farmer community, Mae Hong Son.

<sup>2</sup>MLRBC = Mae Hong Son Livestock Research and Breeding Center, Mae Hong Son.

<sup>3</sup>CLRBC = Chiang Mai Livestock Research and Breeding Center, Chiang Mai.

**Table S22.** Observed and expected heterozygosity in Mae Hong Son chickens (*Gallus gallus*, Linnaeus, 1758) [43] based on 28 microsatellite loci and genetic bottlenecks of each individual chicken. Data were calculated using Bottleneck version 1.2.02 [38]. Detailed information on each Mae Hong Son chickens is presented in Table S1.

| Species              | Locality           | $H_o$       | $H_e$       | $p$ -value | Wilcoxon test |       | Mode-shift test              |
|----------------------|--------------------|-------------|-------------|------------|---------------|-------|------------------------------|
|                      |                    |             |             |            | TPM           | SMM   |                              |
| <i>Gallus gallus</i> | MHSF <sup>1</sup>  | 0.663±0.059 | 0.553±0.034 | $p < 0.05$ | 0.089         | 0.212 | shifted mode                 |
|                      | MLRBC <sup>2</sup> | 0.643±0.060 | 0.598±0.035 | $p < 0.05$ | 0.023         | 0.000 | normal L-shaped distribution |
|                      | CLRBC <sup>3</sup> | 0.621±0.060 | 0.537±0.032 | $p < 0.05$ | 0.000         | 0.000 | shifted mode                 |

$H_o$  = Observed heterozygosity,  $H_e$  = Expected heterozygosity, TPM = Two-phased mutation model, SMM = Stepwise mutation model.

<sup>1</sup>MHSF = Mae Hong Son chickens derived from farmer community, Mae Hong Son.

<sup>2</sup>MLRBC = Mae Hong Son Livestock Research and Breeding Center, Mae Hong Son.

<sup>3</sup>CLRBC = Chiang Mai Livestock Research and Breeding Center, Chiang Mai.

## References

- 1 Phillips, S.J.; Dudík, M. Modeling of species distributions with Maxent: new extensions and a comprehensive evaluation. *Ecography* **2008**, *31*, 161–175. doi: 10.1111/j.0906-7590.2008.5203.x
- 2 Pearson, R.G.; Raxworthy, C.J.; Nakamura, M.; Townsend Peterson, A. Predicting species distributions from small numbers of occurrence records: a test case using cryptic geckos in Madagascar. *J. Biogeogr.* **2007**, *34*, 102–117. doi: 10.1111/j.1365-2699.2006.01594.x
- 3 Baldwin, R.A. Use of maximum entropy modeling in wildlife research. *Entropy* **2009**, *11*, 854–866. doi: 10.3390/e11040854
- 4 Araújo, M.B.; New, M. Ensemble forecasting of species distributions. *Trends Ecol. Evol.* **2007**, *22*, 42–47. doi: 10.1016/j.tree.2006.09.010
- 5 Marmion, M.; Parviainen, M.; Luoto, M.; Heikkinen, R.K.; Thuiller, W. Evaluation of consensus methods in predictive species distribution modelling. *Divers. Distrib.* **2009**, *15*, 59–69. doi: 10.1111/j.1472-4642.2008.00491.x
- 6 Fielding, A. H.; Bell, J.F. A review of methods for the assessment of prediction errors in conservation presence/absence models. *Environ. Conserv.* **1997**, *24*, 38–49. doi: 10.1017/S0376892997000088
- 7 Li, Y.; Li, M.; Li, C.; Liu, Z. Optimized maxent model predictions of climate change impacts on the suitable distribution of *Cunninghamia lanceolata* in China. *Forests* **2020**, *11*, 302.
- 8 Tamura, K.; Stecher, G.; Kumar, S. MEGA11: Molecular evolutionary genetics analysis version 11. *Mol. Biol. Evol.* **2021**, *38*, 3022–3027. doi:10.1093/molbev/msab120.
- 9 Rozas, J.; Ferrer-Mata, A.; Sánchez-DelBarrio, J.C.; Guirao-Rico, S.; Librado, P.; Ramos-Onsins, S.E.; Sánchez-Gracia, A. DnaSP 6: DNA sequence polymorphism analysis of large data sets. *Mol. Biol. Evol.* **2017**, *34*, 3299–3302. doi:10.1093/molbev/msx248.
- 10 Clement, M.; Snell, Q.; Walker, P.; Posada, D.; Crandall, K. TCS: Estimating gene genealogies. *Proceedings of the 16th International Parallel and Distributed Processing Symposium* **2002**, *2*, 184.
- 11 Excoffier, L.; Lischer, H.E. Arlequin suite ver 3.5: a new series of programs to perform population genetics analyses under Linux and Windows. *Mol. Ecol. Resour.* **2010**, *10*, 564–567. doi:10.1111/j.1755-0998.2010.02847.x
- 12 Weir, B.S.; Cockerham, C.C. Estimating *F*-statistics for the analysis of population structure. *Evolution* **1984**, *38*, 1358–1370. doi:10.2307/2408641.

- 13 Excoffier, L.; Smouse, P.E.; Quattro, J.M. Analysis of molecular variance inferred from metric distances among DNA haplotypes: Application to human mitochondrial DNA restriction data. *Genetics* **1992**, *131*, 479–491. doi:10.1093/genetics/131.2.479.
- 14 Tajima, F. Statistical method for testing the neutral mutation hypothesis by DNA polymorphism. *J. Genet.* **1989**, *123*, 585–595. doi:10.1093/genetics/123.3.585.
- 15 Fu, Y.X.; Li, W.H. Statistical tests of neutrality of mutations. *J. Genet.* **1993**, *133*, 693–709. doi:10.1093/genetics/133.3.693.
- 16 Fu, Y.X. Statistical tests of neutrality of mutations against population growth, hitchhiking and background selection. *J. Genet.* **1997**, *147*, 915–925. doi:10.1093/genetics/147.2.915.
- 17 Ramos-Onsins, S.; Rozas, J. Statistical properties of new neutrality tests against population growth. *Mol. Biol. Evol.* **2002**, *19*, 2092–2100. doi:10.1093/oxfordjournals.molbev.a004034.
- 18 Rogers, A.; Harpending, H. Population growth makes waves in the distribution of pairwise genetic differences. *Mol. Biol. Evol.* **1992**, *9*, 552–569. doi:10.1093/oxfordjournals.molbev.a040727.
- 19 Wakeley, J.; Hey, J. Estimating ancestral population parameters. *J. Genet.* **1997**, *145*, 847–855. doi:10.1093/genetics/145.3.847.
- 20 Heled, J.; Drummond, A.J. Bayesian inference of population size history from multiple loci. *BMC Evol. Biol.* **2008**, *8*, 1–15. doi:10.1186/1471-2148-8-289.
- 21 Bouckaert, R.; Vaughan, T.G.; Barido-Sottani, J.; Duchne, S.; Fourment, M.; Gavryushkina, A.; Heled, J.; Jones, G.; Kühnert, D.; De Maio, N.; et al. BEAST 2.5: An advanced software platform for Bayesian evolutionary analysis. *PloS Comput. Biol.* **2019**, *15*, e1006650. doi:10.1371/journal.pcbi.1006650.
- 22 Sawai, H.; Kim, H.L.; Kuno, K.; Suzuki, S.; Gotoh, H.; Takada, M.; Takahata, N.; Satta, Y.; Akishinonomiya, F. The origin and genetic variation of domestic chickens with special reference to junglefowls *Gallus g. gallus* and *G. varius*. *PloS One* **2010**, *5*, e10639. doi:10.1371/journal.pone.0010639.
- 23 Hata, A.; Nunome, M.; Suwanasopee, T.; Duengkae, P.; Chaiwatana, S.; Chamchumroon, W.; Suzuki, T.; Koonawootrittriron, S.; Matsuda, Y.; Srikulnath, K. Origin and evolutionary history of domestic chickens inferred from a large population study of Thai red junglefowl and indigenous chickens. *Sci. Rep.* **2021**, *11*, 1–15. doi:10.1038/s41598-021-81589-7.
- 24 Singchat, W.; Chaiyes, A.; Wongloet, W.; Ariyaphong, N.; Jaisamut, K.; Panthum, T.;



- Ahmad, S.F.; Chaleekarn, W.; Suksavate, W.; Inpota, M.; et al. Red junglefowl resource management guide bioresource reintroduction for sustainable food security in Thailand. *Sustainability* **2022**, *14*, 7895. doi:10.3390/su14137895.
- 25 Guo, S.W.; Thompson, E.A. Performing the exact test of Hardy-Weinberg proportion for multiple alleles. *Biometrics* **1992**, *48*, 361–372. doi:10.2307/2532296.
  - 26 Raymond, M.; Rousset, F. An exact test for population differentiation. *Evolution* **1995**, *49*, 1280–1283. doi:10.1111/j.1558-5646.1995.tb04456.x.
  - 27 R Core Team. *R: A Language and Environment for Statistical Computing*; R Foundation for Statistical Computing. Austria: Vienna, 2022.
  - 28 Welch, B. L. The generalization of student's problem when several different population variances are involved. *Biometrika* **1947**, *34*, 28–35. doi:10.2307/2332510.
  - 29 Goudet, J.F. FSTAT (version 1.2): a computer program to calculate F-statistics. *J. Hered.* **1995**, *86*, 485–486. doi:10.1093/oxfordjournals.jhered.a111627.
  - 30 Van, O.C.; Hutchinson, W.F.; Wills, D.P.; Shipley, P. MICRO-CHECKER: software for identifying and correcting genotyping errors in microsatellite data. *Mol. Ecol. Notes* **2004**, *4*, 535–538. doi:10.1111/j.1471-8286.2004.00684.x.
  - 31 Park, S.D.E. *The Excel Microsatellite Toolkit (version 3.1)*. Ireland: Animal Genomics Laboratory, University College, 2001.
  - 32 Peakall, R.; Smouse, P.E. GenAlEx 6.5: genetic analysis in Excel. Population genetic software for teaching and research—an update. *J. Bioinform.* **2012**, *28*, 2537–2539. doi:10.1093/bioinformatics/bts460.
  - 33 Lynch, M.; Ritland, K. Estimation of pairwise relatedness with molecular markers. *J. Genet.* **1999**, *152*, 1753–1766. doi:10.1093/genetics/152.4.
  - 34 Wang, J. COANCESTRY: a program for simulating, estimating and analysing relatedness and inbreeding coefficients. *Mol. Ecol. Resour.* **2011**, *11*, 141–145. doi:10.1111/j.1755-0998.2010.
  - 35 Præstgaard, J.T. Permutation and bootstrap Kolmogorov-Smirnov tests for the equality of two distributions. *Scand. J. Stat.* **1995**, *22*, 305–322.
  - 36 Chapuis, M.P.; Estoup, A. Microsatellite null alleles and estimation of population differentiation. *Mol. Biol. Evol.* **2007**, *24*, 621–631. doi:10.1093/molbev/msl191.
  - 37 Nei, M. Genetic distance between populations. *Am. Nat.* **1972**, *106*, 283–292. doi:10.1086/282771.

- 38 Piry, S.; Luikart, G.; Cornuet, J.M. BOTTLENECK: a computer program for detecting recent reductions in the effective population size using allele frequency data. *J. Hered.* **1999**, *90*, 502–503. doi:10.1093/jhered/90.4.502.
- 39 Garza, J.C.; Williamson, E.G. Detection of reduction in population size using data from microsatellite loci. *Mol. Ecol.* **2001**, *10*, 305–318. doi:10.1046/j.1365-294X.2001.01190.x.
- 40 Jombart, T. adegenet: a R package for the multivariate analysis of genetic markers. *J. Bioinform.* **2008**, *24*, 1403–1405. doi:10.1093/bioinformatics/btn129.
- 41 Pritchard, J.K.; Stephens, M.; Donnelly, P. Inference of population structure using multilocus genotype data. *J. Genet.* **2000**, *155*, 945–959. doi:10.1093/genetics/155.2.945.
- 42 Earl, D.A. Structure harvester: a website and program for visualizing STRUCTURE output and implementing the Evanno method. *Conserv. Genet. Resour.* **2012**, *4*, 359–361. doi:10.1007/s12686-011-9548-7.
- 43 Linnaeus, C. *Systema Naturæ per Regna tria Naturæ, Secundum Classes, Ordines, Genera, Species, cum Characteribus, Differentiis, Synonymis, Locis*. Austria: Tomus, I., Ed.; Reformata: Holmiæ, Salvius; Reformata: Holmiæ, Salvius; Vindobonae: Vienn, 1758
- 44 Do, C.; Waples, R.S.; Peel, D.; Macbeth, G.M.; Tillett, B.J.; Ovenden, J.R. NeEstimator v2: Reimplementation of software for the estimation of contemporary effective population size ( $N_e$ ) from genetic data. *Mol. Ecol. Resour.* **2014**, *14*, 209–214. doi: 10.1111/1755-0998.12157
